# Supplementary material for: Unraveling the electronic origin of a special feature in the triplet-minus-singlet spectra of carotenoids in natural photosystems
Source: Royal Society of Chemistry journal article supplement (doi:10.1039/d3cp03836j), 2023-01-01
Supplement: d3cp03836j1.pdf [file d3cp03836j1.pdf]

## Supplementary Information

Unraveling the electronic origin of a special feature in the  
triplet-minus-singlet spectra of carotenoids in natural  
photosystems

Agostino Migliore,<sup>1</sup>\* Stefano Corni,<sup>1,2</sup> Alessandro Agostini,<sup>1</sup> Donatella Carbonera<sup>1</sup>\*

<sup>1</sup> Department of Chemical Sciences, University of Padova, Via Marzolo 1, 35131 Padova, Italy

<sup>2</sup> CNR Institute of Nanoscience, 41125 Modena, Italy

\* Emails: [agostino.migliore@unipd.it](mailto:agostino.migliore@unipd.it); [donatella.carbonera@unipd.it](mailto:donatella.carbonera@unipd.it)

## Contents

|                                                                                                                                 |            |
|---------------------------------------------------------------------------------------------------------------------------------|------------|
| <b>S1. Triplet localization in the <i>ortho</i>-carotenoporphyrin dyad</b>                                                      | <b>S2</b>  |
| <b>S2. Properties of the electronic excitations in the model dyad</b>                                                           | <b>S3</b>  |
| <b>S3. Details on some electronic excitations in the model dyad</b>                                                             | <b>S6</b>  |
| <b>S4. Tests of computational accuracy</b>                                                                                      | <b>S9</b>  |
| <b>S5. Set of NTOs in Fig. 6 complemented with further NTOs</b>                                                                 | <b>S10</b> |
| <b>S6. Transition spin density for the <math>T_1 \rightarrow T_2</math> transition in dyad's structure <math>Q_{T_1}</math></b> | <b>S13</b> |
| <b>S7. Shape dependence of T-S spectra on the Gaussian broadening parameter</b>                                                 | <b>S16</b> |
| <b>S8. Additional NTOs and excited states for the molecular models from LHCII</b>                                               | <b>S16</b> |
| <b>S9. Properties of the singlet transitions</b>                                                                                | <b>S31</b> |
| <b>S10. Atomic coordinates of the M, M' and M'' systems</b>                                                                     | <b>S34</b> |

### S1. Triplet localization in the *ortho*-carotenoporphyrin dyad

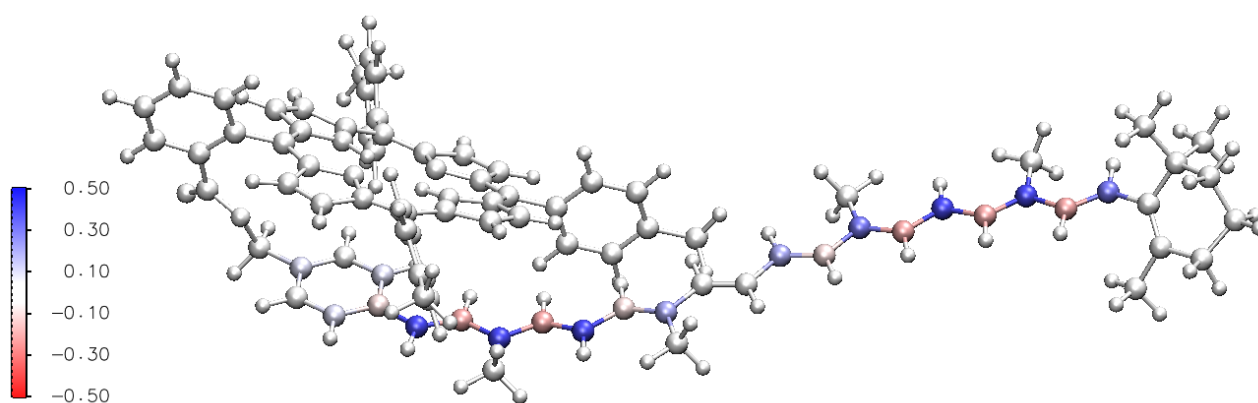

**Fig. S1** Electron spin density on the *ortho*-carotenoporphyrin molecular system in tetrahydrofuran (THF) environment modeled as a polarizable continuum medium (PCM), with coordinates optimized<sup>1</sup> in the lowest triplet ( $T_1$ ) state. We obtained the electron spin density by means of TDDFT calculation, at the  $\omega$ B97X-D<sup>2</sup>/6-31g\* level of computational accuracy, followed by Mulliken population analysis.

## S2. Properties of the electronic excitations in the model dyad

This section reports the full sets of excited states obtained for the model dyad in the different PCMs, using different computational setups.

**Table S1** Electronic excitations in the *ortho*-carotenoporphyryin dyad, in THF, at the indicated atomic coordinates, calculated by TDDFT at the  $\omega$ B97X-D/6-31g\* level of computational accuracy. Table 1 reports a subset of these transitions. The wavelengths of excitation are expressed in nm. In the notation below,  $\Sigma \equiv \langle S^2 \rangle$  and  $n \geq 1$  ( $n \geq 2$ ) for the singlet (triplet) electronic transitions. The triplet excitations obtained with excessive spin contamination are shown in gray and not considered in the analysis.

| $\lambda_{S_0 \rightarrow S_n}(Q_{S_0})$ | $f_{S_0 \rightarrow S_n}(Q_{S_0})$ | $\lambda_{S_0 \rightarrow S_n}(Q_{T_1})$ | $f_{S_0 \rightarrow S_n}(Q_{T_1})$ | $\lambda_{T_1 \rightarrow T_n}(Q_{T_1})$ | $f_{T_1 \rightarrow T_n}(Q_{T_1})$ | $\Sigma_{T_1 \rightarrow T_n}(Q_{T_1})$ |
|------------------------------------------|------------------------------------|------------------------------------------|------------------------------------|------------------------------------------|------------------------------------|-----------------------------------------|
| 607.94                                   | 0.0250                             | 978.00                                   | 3.9243                             | 2522.18                                  | 0.0000                             | 4.229                                   |
| 553.25                                   | 0.0456                             | 612.90                                   | 0.0237                             | 967.95                                   | 0.0000                             | 4.225                                   |
| 457.79                                   | 4.0941                             | 564.48                                   | 0.0416                             | 782.72                                   | 0.0299                             | 2.801                                   |
| 403.02                                   | 0.4879                             | 535.06                                   | 0.0097                             | 611.02                                   | 0.0364                             | 2.265                                   |
| 393.24                                   | 1.3738                             | 517.06                                   | 0.0321                             | 608.54                                   | 0.0003                             | 4.192                                   |
| 379.98                                   | 0.8374                             | 461.54                                   | 0.0358                             | 603.49                                   | 0.0001                             | 4.207                                   |
| 371.48                                   | 0.7042                             | 421.88                                   | 0.1451                             | 556.44                                   | 0.0375                             | 2.244                                   |
| 342.43                                   | 0.0599                             | 404.68                                   | 0.1140                             | 548.51                                   | 0.0063                             | 2.277                                   |
| 318.84                                   | 0.0031                             | 388.96                                   | 1.1567                             | 494.61                                   | 1.5593                             | 2.268                                   |
| 314.64                                   | 0.0020                             | 381.91                                   | 1.5549                             | 484.35                                   | 2.0631                             | 2.404                                   |
| 301.89                                   | 0.3048                             | 363.28                                   | 0.1365                             | 470.65                                   | 0.1535                             | 2.374                                   |
| 291.85                                   | 0.0479                             | 338.47                                   | 0.4172                             | 460.41                                   | 0.6472                             | 2.737                                   |
| 289.23                                   | 0.0761                             | 319.59                                   | 0.0020                             | 399.48                                   | 0.0207                             | 3.275                                   |
| 286.47                                   | 0.1334                             | 317.08                                   | 0.6263                             | 395.22                                   | 1.1938                             | 2.279                                   |
| 285.64                                   | 0.2092                             | 313.90                                   | 0.0025                             | 391.24                                   | 0.0482                             | 4.115                                   |
| 280.91                                   | 0.0049                             | 309.05                                   | 0.0259                             | 389.24                                   | 0.7954                             | 2.436                                   |
| 278.62                                   | 0.3597                             | 301.59                                   | 0.4858                             | 382.49                                   | 0.9468                             | 2.310                                   |
| 277.71                                   | 0.0048                             | 287.05                                   | 0.0684                             | 382.07                                   | 0.0015                             | 4.230                                   |
| 276.01                                   | 0.0255                             | 283.10                                   | 0.0122                             | 371.11                                   | 0.2794                             | 2.254                                   |
| 274.88                                   | 0.0071                             | 279.54                                   | 0.0127                             | 366.11                                   | 0.0059                             | 4.154                                   |

**Table S2** Triplet excitations in dyad structure  $Q_{T_1}$  obtained from  $\omega$ B97X-D/6-31g\* computations in vacuum (subscript v), and in polarizable continuous media that mimic the interior of proteins (p) and the tetrahydrofuran solvent (THF).

| $\lambda_{\text{THF}}$ | $f_{\text{THF}}$ | $\Sigma_{\text{THF}}$ | $\lambda_{\text{p}}$ | $f_{\text{p}}$ | $\Sigma_{\text{p}}$ | $\lambda_{\text{v}}$ | $f_{\text{v}}$ | $\Sigma_{\text{v}}$ |
|------------------------|------------------|-----------------------|----------------------|----------------|---------------------|----------------------|----------------|---------------------|
| 2522.18                | 0.0000           | 4.229                 | 2715.96              | 0.0000         | 4.232               | 2916.05              | 0.0000         | 4.234               |
| 967.95                 | 0.0000           | 4.225                 | 959.66               | 0.0000         | 4.228               | 948.64               | 0.0000         | 4.231               |
| 782.72                 | 0.0299           | 2.801                 | 784.34               | 0.0336         | 2.810               | 784.29               | 0.0318         | 2.816               |
| <b>611.02</b>          | <b>0.0364</b>    | <b>2.265</b>          | <b>610.97</b>        | <b>0.0279</b>  | <b>2.282</b>        | 611.66               | 0.0004         | 4.176               |
| 608.54                 | 0.0003           | 4.192                 | 610.04               | 0.0003         | 4.198               | 610.85               | 0.0134         | 2.639               |
| 603.49                 | 0.0001           | 4.207                 | 606.32               | 0.0002         | 4.200               | 609.66               | 0.0027         | 3.875               |
| 556.44                 | 0.0375           | 2.244                 | 554.30               | 0.0351         | 2.245               | 552.11               | 0.0270         | 2.246               |
| 548.51                 | 0.0063           | 2.277                 | 548.03               | 0.0039         | 2.282               | 547.26               | 0.0022         | 2.286               |
| 494.61                 | 1.5593           | 2.268                 | 486.49               | 1.9835         | 2.271               | 473.10               | 0.2761         | 2.352               |
| 484.35                 | 2.0631           | 2.404                 | 479.13               | 1.3483         | 2.517               | 472.38               | 1.6031         | 2.696               |
| 470.65                 | 0.1535           | 2.374                 | 462.34               | 0.0991         | 2.505               | 452.54               | 1.3630         | 2.424               |
| 460.41                 | 0.6472           | 2.737                 | 456.77               | 0.9869         | 2.503               | 444.69               | 0.9268         | 2.339               |
| 399.48                 | 0.0207           | 3.275                 | 400.49               | 0.0170         | 3.250               | 402.02               | 0.0320         | 3.049               |
| <b>395.22</b>          | <b>1.1938</b>    | <b>2.279</b>          | 395.96               | 0.0035         | 4.196               | 401.32               | 0.0016         | 4.127               |
| 391.24                 | 0.0482           | 4.115                 | 392.88               | 0.3389         | 2.463               | 396.59               | 0.0153         | 2.769               |
| 389.24                 | 0.7954           | 2.436                 | <b>388.62</b>        | <b>1.0407</b>  | <b>2.270</b>        | 390.01               | 0.0000         | 4.236               |
| 382.49                 | 0.9468           | 2.310                 | 386.26               | 0.0002         | 4.232               | <b>381.86</b>        | <b>1.1303</b>  | <b>2.242</b>        |
| 382.07                 | 0.0015           | 4.230                 | <b>378.89</b>        | <b>1.4523</b>  | <b>2.252</b>        | 368.94               | 1.0232         | 2.305               |
| 371.11                 | <b>0.2794</b>    | <b>2.254</b>          | 366.95               | 0.0068         | 4.142               | 367.04               | 0.0411         | 4.162               |
| 366.11                 | 0.0059           | 4.154                 | 364.46               | 0.2488         | 2.313               | 359.07               | 0.3464         | 2.389               |

**Table S3** Triplet excitations in the  $Q_{S_0}$  structure of the *ortho*-carotenoporphyry dyad in THF.

| $\lambda_{\text{THF}}$ | $f_{\text{THF}}$ | $\Sigma_{\text{THF}}$ |
|------------------------|------------------|-----------------------|
| 3550.25                | 0.0001           | 2.099                 |
| 1505.84                | 0.0000           | 4.129                 |
| 1332.44                | 0.0003           | 2.165                 |
| 764.31                 | 0.0003           | 4.017                 |
| 694.63                 | 0.0423           | 2.337                 |
| 658.79                 | 0.1249           | 2.147                 |
| 621.25                 | 0.0515           | 2.900                 |
| 543.79                 | 0.0091           | 3.884                 |
| 518.02                 | 0.0903           | 2.477                 |
| 484.54                 | 0.0148           | 2.575                 |
| 481.77                 | 0.0152           | 2.534                 |
| 457.74                 | 0.2095           | 2.366                 |
| 454.73                 | 3.8475           | 2.167                 |
| 439.30                 | 0.0995           | 2.355                 |
| 424.09                 | 0.1634           | 2.522                 |
| 418.76                 | 0.1033           | 3.504                 |
| 417.66                 | 0.0245           | 2.417                 |
| 413.36                 | 0.4618           | 2.471                 |
| 412.30                 | 0.0142           | 2.172                 |
| 407.34                 | 0.1000           | 2.336                 |

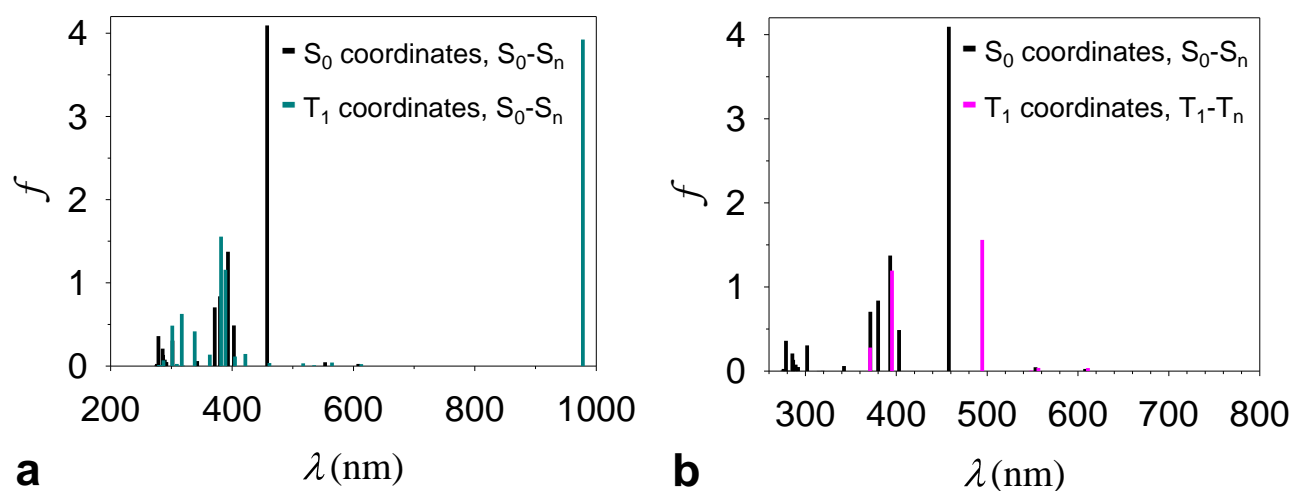

**Fig. S2** (a) and (b) show the electronic transitions as in Figs. 4a and 4c, respectively, over wider spectral ranges.

**Table S4** Triplet excitations in dyad structure  $Q_{S_0}$  in protein-interior medium (p) and in vacuum (v).

| $\lambda_p$ | $f_p$  | $\Sigma_p$ | $\lambda_v$ | $f_v$  | $\Sigma_v$ |
|-------------|--------|------------|-------------|--------|------------|
| 3427.04     | 0.0002 | 2.102      | 3310.03     | 0.0001 | 2.103      |
| 1549.24     | 0.0000 | 4.132      | 1574.18     | 0.0000 | 4.133      |
| 1360.12     | 0.0003 | 2.164      | 1387.44     | 0.0002 | 2.163      |
| 770.43      | 0.0001 | 4.057      | 773.55      | 0.0001 | 4.080      |
| 686.13      | 0.0502 | 2.316      | 674.72      | 0.0515 | 2.321      |
| 655.60      | 0.0949 | 2.150      | 648.04      | 0.0538 | 2.160      |
| 626.41      | 0.0471 | 2.870      | 628.80      | 0.0323 | 2.827      |
| 547.77      | 0.0113 | 3.762      | 552.86      | 0.0176 | 3.252      |
| 526.04      | 0.0597 | 2.604      | 535.63      | 0.0228 | 3.116      |
| 489.28      | 0.0077 | 2.507      | 492.94      | 0.0031 | 2.415      |
| 484.10      | 0.0163 | 2.625      | 486.90      | 0.0129 | 2.725      |
| 459.76      | 0.0030 | 2.395      | 460.43      | 0.0002 | 2.406      |
| 449.45      | 4.0035 | 2.152      | 444.35      | 0.0297 | 2.382      |
| 440.34      | 0.1031 | 2.372      | 435.26      | 3.7246 | 2.160      |
| 422.76      | 0.0514 | 3.233      | 425.67      | 0.0643 | 2.216      |
| 421.66      | 0.0048 | 2.745      | 422.71      | 0.0026 | 4.031      |
| 420.24      | 0.0560 | 2.336      | 420.30      | 0.0671 | 2.304      |
| 416.13      | 0.1104 | 2.491      | 417.99      | 0.0047 | 2.201      |
| 414.23      | 0.0422 | 2.204      | 409.06      | 0.1661 | 2.287      |
| 407.78      | 0.5509 | 2.415      | 400.19      | 0.5355 | 2.457      |

### S3. Details on some electronic excitations in the model dyad

In this section we report some details on relevant electronic excitations in the molecular dyad derived from the output files of the Gaussian 16 program.<sup>3</sup>

#### $S_0(Q_{T_1}) \rightarrow S_n(Q_{T_1})$ transition in THF (central panel in Table S1)

$S_0 \rightarrow S_1$ : excitation energy = 1.2677 eV, wavelength = 978.00 nm,  $f= 3.9243$

main single-particle transition involved and corresponding coefficient:

321 → 322      0.69446

Molecular Orbital (MO) 321 = HOMO, MO 322 = LUMO. The largest electron density of the HOMO is on a C atom of the carotenoid moiety, which is C8' using the nomenclature of ref. 1. The highest density of the LUMO is on C4 of carotenoid. This excited state is not found for the S<sub>0</sub> structure.

A similar description of the transition is obtained using the 6-31g\*\* (excitation energy = 1.2652 eV, wavelength = 979.96 nm,  $f = 3.9159$ ) and cc-pVDZ (excitation energy = 1.2421 eV, wavelength = 998.16 nm,  $f = 3.9101$ ) basis sets, as well as other exchange-correlation functionals such as M06-2X (excitation energy = 1.3083 eV, wavelength = 947.69 nm,  $f = 3.8576$ ) and M11 (excitation energy = 1.3083 eV, wavelength = 947.66 nm,  $f = 3.8499$ ).

**S<sub>0</sub> → S<sub>2</sub>**: excitation energy = 2.0229 eV, wavelength = 612.90 nm,  $f = 0.0237$

main single-particle transitions involved and corresponding coefficients:

|           |          |                     |
|-----------|----------|---------------------|
| 318 → 323 | 0.14669  |                     |
| 318 → 324 | 0.16373  |                     |
| 319 → 323 | -0.29132 | HOMO – 2 → LUMO + 1 |
| 319 → 324 | -0.21832 |                     |
| 320 → 323 | -0.35168 | HOMO – 1 → LUMO + 1 |
| 320 → 324 | 0.41448  | HOMO – 1 → LUMO + 2 |
| 321 → 324 | -0.13903 |                     |

MO 319 and MO 320, which are the HOMO – 2 and HOMO – 1, respectively, are well localized on the tetrapyrrole. The same holds for MO 323 (LUMO + 1) and MO 324 (LUMO + 2), which are essentially degenerate.

Therefore, the transition mainly takes place in the porphyrin part, with a secondary contribution of a (single-particle) excitation from the carotenoid component of the dyad, as the maximum electron density of MO 321 is on atom C8' of the carotenoid component.

This electronic excitation is similar to the one at 607.94 nm that occurs in the S<sub>0</sub> structure (see below).

**S<sub>0</sub>(Q<sub>S<sub>0</sub>) → S<sub>1</sub>(Q<sub>S<sub>0</sub>) transition in THF (left panel in Table S1)</sub></sub>**

excitation energy = 2.0394 eV; wavelength = 607.94 nm;  $f = 0.0250$

main single-particle transitions involved and corresponding coefficients:

|           |          |                     |
|-----------|----------|---------------------|
| 318 → 323 | -0.13928 |                     |
| 319 → 322 | 0.21739  |                     |
| 319 → 323 | -0.33477 | HOMO – 2 → LUMO + 1 |
| 320 → 322 | 0.48034  | HOMO – 1 → LUMO     |
| 320 → 323 | 0.26896  | HOMO – 1 → LUMO + 1 |
| 321 → 323 | -0.11306 |                     |

The HOMO – 1 is localized on the tetrapyrrole and is very similar to the corresponding MO in the  $Q_{T_1}$  structure. The HOMO – 2 also is localized on the tetrapyrrole.

LUMO and LUMO + 1 are very similar in energy and spatial distribution to the LUMO + 1 and LUMO + 2, respectively in the  $Q_{T_1}$  nuclear conformation.

### $T_1(Q_{T_1}) \rightarrow T_2(Q_{T_1})$ transition in THF (right panel in Table S1)

excitation energy = 2.0291 eV; wavelength = 611.02 nm;  $f = 0.0364$ ;  $\langle S^2 \rangle = 2.265$

main single-particle transitions involved and corresponding coefficients:

|             |          |                                       |
|-------------|----------|---------------------------------------|
| 319A → 323A | -0.30575 | $\alpha$ HOMO – 3 → $\alpha$ LUMO     |
| 319A → 324A | -0.33330 | $\alpha$ HOMO – 3 → $\alpha$ LUMO + 1 |
| 320A → 323A | -0.29855 |                                       |
| 320A → 324A | 0.40475  | $\alpha$ HOMO – 2 → $\alpha$ LUMO + 1 |
| 321A → 324A | -0.19194 |                                       |
| 318B → 322B | 0.14552  |                                       |
| 319B → 322B | -0.37604 |                                       |
| 320B → 321B | -0.16241 |                                       |
| 320B → 322B | -0.15876 |                                       |
| 320B → 323B | 0.52343  | $\beta$ HOMO → $\beta$ LUMO + 3       |

The  $\alpha$ HOMO – 2 is localized on the tetrapyrrole. This MO is similar to the HOMO – 1 of the  $Q_{T_1}$  structure in the singlet spin state, which is involved in the  $S_0(Q_{T_1}) \rightarrow S_2(Q_{T_1})$ . The  $\alpha$ HOMO – 3 also has the highest density on the tetrapyrrole. Similar considerations hold for the  $\alpha$ LUMO and  $\alpha$ LUMO + 1, which are essentially degenerate and very similar to the LUMO + 1 and LUMO + 2 of the same  $Q_{T_1}$  structure in the singlet spin state. Regarding the  $\beta$ MOs, we just mention that  $\beta$ MO 320 resembles the corresponding spin-up MO.



## S4. Tests of computational accuracy

Table S5 reports the properties of the triplet excitations in the  $Q_{T_1}$  structure of the molecular dyad in THF environment, obtained by TDDFT computations with the  $\omega$ B97X-D functional and the indicated basis sets. The electronic excitations are similarly identified using the different computational setups, although the acceptability of their spin contamination can depend on the basis set, thus showing that the chosen threshold for the spin contamination is arbitrary to some relatively small extent.

**Table S5** Basis set effects

| $\lambda_{T_1 \rightarrow T_n}^{6-31g^*}$ | $f_{T_1 \rightarrow T_n}^{6-31g^*}$ | $\Sigma_{T_1 \rightarrow T_n}^{6-31g^*}$ | $\lambda_{T_1 \rightarrow T_n}^{6-31g^{**}}$ | $f_{T_1 \rightarrow T_n}^{6-31g^{**}}$ | $\Sigma_{T_1 \rightarrow T_n}^{6-31g^{**}}$ | $\lambda_{T_1 \rightarrow T_n}^{cc-pVDZ}$ | $f_{T_1 \rightarrow T_n}^{cc-pVDZ}$ | $\Sigma_{T_1 \rightarrow T_n}^{cc-pVDZ}$ |
|-------------------------------------------|-------------------------------------|------------------------------------------|----------------------------------------------|----------------------------------------|---------------------------------------------|-------------------------------------------|-------------------------------------|------------------------------------------|
| 2522.18                                   | 0.0000                              | 4.229                                    | 2513.60                                      | 0.0000                                 | 4.229                                       | 2431.70                                   | 0.0000                              | 4.218                                    |
| 967.95                                    | 0.0000                              | 4.225                                    | 968.07                                       | 0.0000                                 | 4.225                                       | 980.96                                    | 0.0000                              | 4.214                                    |
| 782.72                                    | 0.0299                              | 2.801                                    | 783.72                                       | 0.0287                                 | 2.801                                       | 782.06                                    | 0.0313                              | 2.766                                    |
| <b>611.02</b>                             | <b>0.0364</b>                       | <b>2.265</b>                             | <b>611.40</b>                                | <b>0.0363</b>                          | <b>2.265</b>                                | <b>616.31</b>                             | <b>0.0355</b>                       | <b>2.236</b>                             |
| 608.54                                    | 0.0003                              | 4.192                                    | 609.02                                       | 0.0003                                 | 4.192                                       | 611.12                                    | 0.0001                              | 4.198                                    |
| 603.49                                    | 0.0001                              | 4.207                                    | 603.70                                       | 0.0001                                 | 4.208                                       | 605.66                                    | 0.0000                              | 4.198                                    |
| 556.44                                    | 0.0375                              | 2.244                                    | 556.68                                       | 0.0364                                 | 2.244                                       | 562.34                                    | 0.0338                              | 2.234                                    |
| 548.51                                    | 0.0063                              | 2.277                                    | 549.26                                       | 0.0062                                 | 2.277                                       | 554.10                                    | 0.0081                              | 2.265                                    |
| 494.61                                    | 1.5593                              | 2.268                                    | 494.69                                       | 1.7405                                 | 2.265                                       | 499.97                                    | 2.3836                              | 2.247                                    |
| 484.35                                    | 2.0631                              | 2.404                                    | 484.60                                       | 1.8993                                 | 2.410                                       | 488.47                                    | 1.4678                              | 2.375                                    |
| 470.65                                    | 0.1535                              | 2.374                                    | 470.60                                       | 0.1272                                 | 2.376                                       | 473.79                                    | 0.1523                              | 2.348                                    |
| 460.41                                    | 0.6472                              | 2.737                                    | 461.06                                       | 0.6498                                 | 2.731                                       | 463.46                                    | 0.4098                              | 2.780                                    |
| 399.48                                    | 0.0207                              | 3.275                                    | 400.10                                       | 0.0196                                 | 3.279                                       | 401.23                                    | 0.1154                              | 3.021                                    |
| <b>395.22</b>                             | <b>1.1938</b>                       | <b>2.279</b>                             | <b>395.68</b>                                | <b>1.1943</b>                          | <b>2.275</b>                                | 399.38                                    | 1.1073                              | 2.406                                    |
| 391.24                                    | 0.0482                              | 4.115                                    | 391.30                                       | 0.0845                                 | 4.022                                       | 394.30                                    | 0.5959                              | 2.449                                    |
| 389.24                                    | 0.7954                              | 2.436                                    | 389.77                                       | 0.7427                                 | 2.528                                       | 390.78                                    | 0.0323                              | 4.164                                    |
| 382.49                                    | 0.9468                              | 2.310                                    | 382.97                                       | 0.9546                                 | 2.308                                       | <b>386.90</b>                             | <b>1.0825</b>                       | <b>2.289</b>                             |
| 382.07                                    | 0.0015                              | 4.230                                    | 382.17                                       | 0.0007                                 | 4.230                                       | 381.30                                    | 0.0004                              | 4.220                                    |
| 371.11                                    | <b>0.2794</b>                       | <b>2.254</b>                             | <b>371.79</b>                                | <b>0.2864</b>                          | <b>2.251</b>                                | <b>376.06</b>                             | <b>0.3463</b>                       | <b>2.216</b>                             |
| 366.11                                    | 0.0059                              | 4.154                                    | 366.40                                       | 0.0053                                 | 4.159                                       | 366.31                                    | 0.0019                              | 4.182                                    |

Table S6 compares the triplet excitations obtained with the  $\omega$ B97X-D and CAM-B3LYP<sup>4</sup> functionals.

CAM-B3LYP, compared to  $\omega$ B97X-D, produces more excited states affected by spin contamination.

**Table S6** Triplet electronic excitations obtained with the indicated exchange-correlation functionals.

| $\lambda_{\omega\text{B97X-D}}$ | $f_{\omega\text{B97X-D}}$ | $\Sigma_{\omega\text{B97X-D}}$ | $\lambda_{\text{CAM-B3LYP}}$ | $f_{\text{CAM-B3LYP}}$ | $\Sigma_{\text{CAM-B3LYP}}$ |
|---------------------------------|---------------------------|--------------------------------|------------------------------|------------------------|-----------------------------|
| 2522.18                         | 0.0000                    | 4.229                          | 2345.46                      | 0.0000                 | 4.247                       |
| 967.95                          | 0.0000                    | 4.225                          | 928.66                       | 0.0000                 | 4.242                       |
| 782.72                          | 0.0299                    | 2.801                          | 796.31                       | 0.0276                 | 2.849                       |
| <b>611.02</b>                   | <b>0.0364</b>             | <b>2.265</b>                   | 615.31                       | 0.0002                 | 4.221                       |
| 608.54                          | 0.0003                    | 4.192                          | 608.83                       | 0.0002                 | 4.215                       |
| 603.49                          | 0.0001                    | 4.207                          | <b>595.83</b>                | <b>0.0410</b>          | <b>2.259</b>                |
| 556.44                          | <b>0.0375</b>             | 2.244                          | 553.15                       | 0.0112                 | 2.320                       |
| 548.51                          | <b>0.0063</b>             | 2.277                          | 543.94                       | <b>0.0288</b>          | <b>2.285</b>                |
| 494.61                          | <b>1.5593</b>             | 2.268                          | 528.99                       | 0.0875                 | 2.317                       |
| 484.35                          | 2.0631                    | 2.404                          | 521.66                       | 0.0805                 | 2.332                       |
| 470.65                          | 0.1535                    | 2.374                          | 487.25                       | 3.5567                 | 2.376                       |
| 460.41                          | 0.6472                    | 2.737                          | 465.42                       | 0.5904                 | 2.833                       |
| 399.48                          | 0.0207                    | 3.275                          | 415.78                       | 0.0400                 | 2.414                       |
| <b>395.22</b>                   | <b>1.1938</b>             | <b>2.279</b>                   | 404.56                       | 0.0325                 | 3.345                       |
| 391.24                          | 0.0482                    | 4.115                          | 400.01                       | 0.0017                 | 4.244                       |
| 389.24                          | 0.7954                    | 2.436                          | <b>397.25</b>                | <b>1.1697</b>          | <b>2.273</b>                |
| 382.49                          | 0.9468                    | 2.310                          | 391.09                       | 0.0040                 | 4.239                       |
| 382.07                          | 0.0015                    | 4.230                          | 389.50                       | 1.2372                 | 2.305                       |
| 371.11                          | <b>0.2794</b>             | <b>2.254</b>                   | 382.98                       | 0.2236                 | 2.586                       |
| 366.11                          | 0.0059                    | 4.154                          | 379.39                       | 0.1710                 | 2.751                       |

**S5. Set of NTOs in Fig. 6 complemented with further NTOs**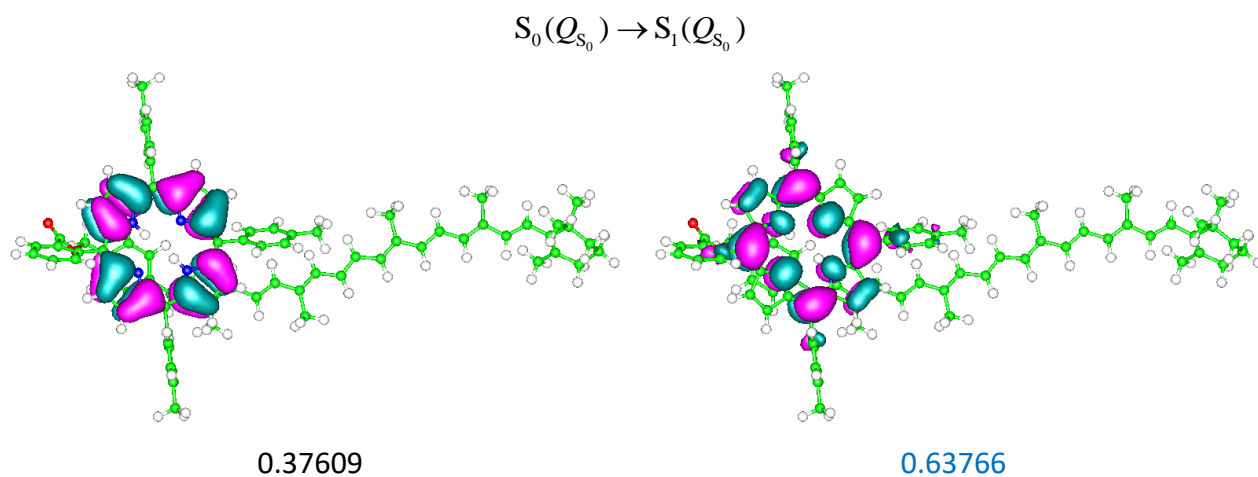

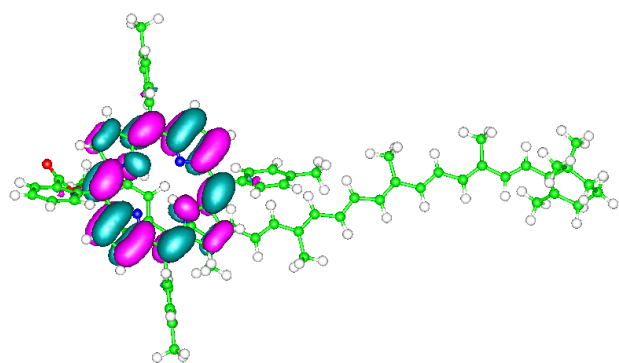

0.63766

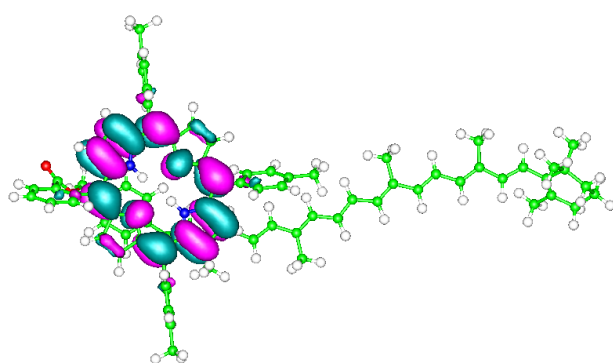

0.37609

$S_0(Q_T) \rightarrow S_2(Q_T)$

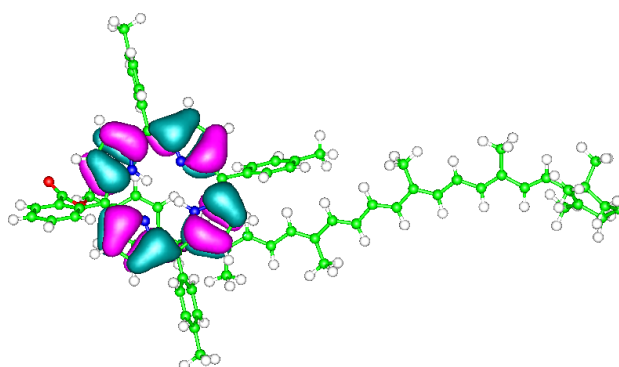

0.37381

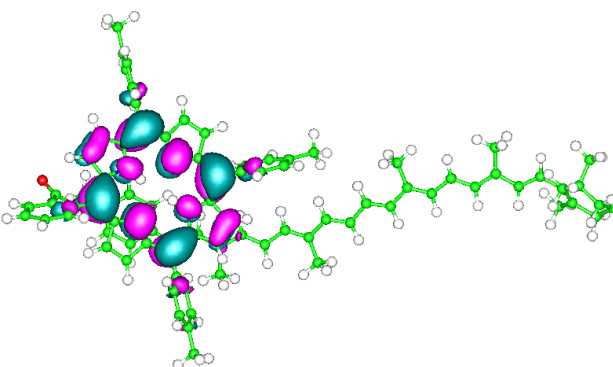

0.63907

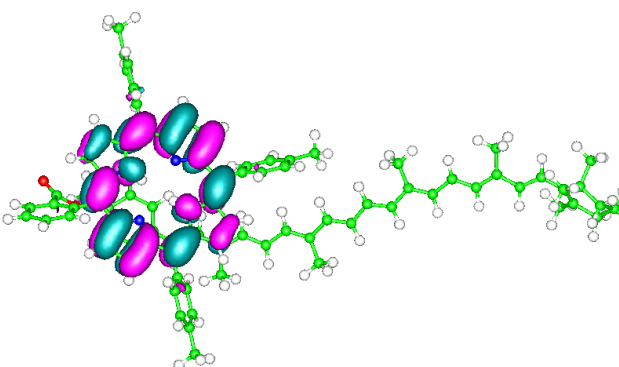

0.63907

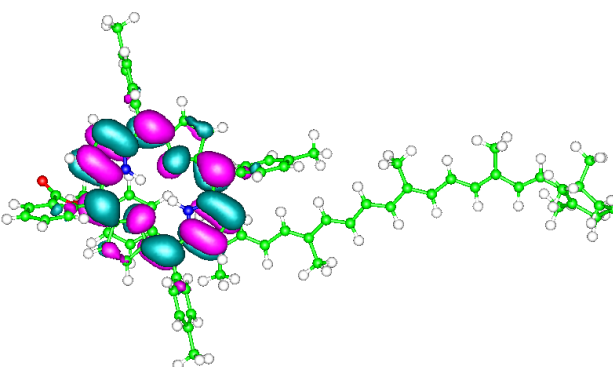

0.37381

$T_1^\alpha(Q_T) \rightarrow T_2^\alpha(Q_T)$

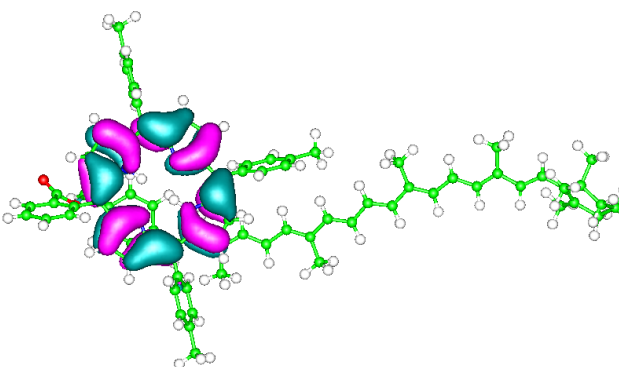

0.36451

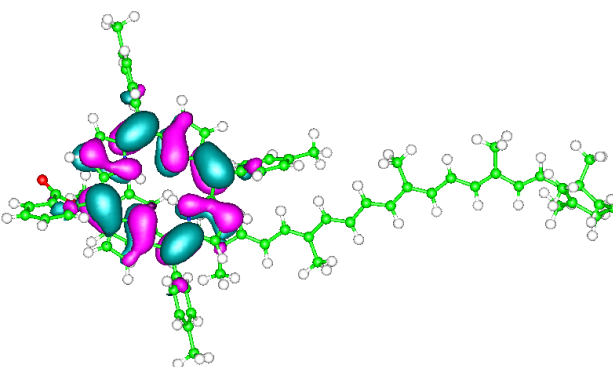

0.66312



## S6. Transition spin density for the $T_1 \rightarrow T_2$ transition in dyad's structure $Q_{T_1}$

**Table S7** Mulliken electron spin density in the  $T_1$  state (which is localized on the carotenoid) and  $T_1 \rightarrow T_2$  transition density. The latter is negligible, meaning that the electron density rearrangement does not entail the electron spin density on the carotenoid moiety.

| atom | $T_1$ spin density | $T_1 \rightarrow T_2$ transition spin density |
|------|--------------------|-----------------------------------------------|
| C    | -0.079086          | 0.000188                                      |
| C    | 0.094551           | -0.000293                                     |
| C    | -0.006605          | 0.000022                                      |
| C    | 0.000892           | -0.000004                                     |
| C    | -0.000138          | -0.000002                                     |
| C    | 0.009911           | -0.000022                                     |
| C    | -0.007246          | 0.000012                                      |
| H    | 0.003210           | -0.000012                                     |
| H    | 0.002473           | -0.000015                                     |
| H    | 0.001452           | -0.000006                                     |
| H    | 0.004776           | -0.000015                                     |
| H    | -0.000011          | -0.000000                                     |
| H    | 0.000010           | 0.000000                                      |
| H    | 0.000031           | 0.000001                                      |
| H    | 0.000834           | -0.000004                                     |
| C    | -0.001796          | 0.000007                                      |
| H    | 0.000064           | -0.000000                                     |
| H    | -0.000211          | 0.000004                                      |
| H    | 0.000298           | -0.000000                                     |
| C    | 0.000503           | -0.000001                                     |
| H    | 0.000056           | 0.000000                                      |
| H    | -0.000199          | 0.000003                                      |
| H    | 0.000229           | 0.000007                                      |
| C    | 0.327686           | -0.000217                                     |
| H    | -0.015601          | 0.000003                                      |
| C    | -0.208535          | 0.000265                                      |
| H    | 0.007669           | -0.000010                                     |
| C    | 0.448691           | 0.000196                                      |
| C    | -0.033106          | -0.000029                                     |
| H    | 0.014389           | -0.000007                                     |
| H    | 0.015055           | -0.000009                                     |
| H    | 0.000849           | -0.000001                                     |
| C    | -0.294288          | -0.000206                                     |
| H    | 0.011083           | 0.000016                                      |
| C    | 0.481208           | 0.000441                                      |
| H    | -0.020935          | -0.000028                                     |
| C    | -0.264685          | 0.000501                                      |
| H    | 0.009887           | -0.000031                                     |
| C    | 0.392175           | 0.000027                                      |
| C    | -0.028693          | -0.000008                                     |
| H    | 0.000672           | 0.000002                                      |
| H    | 0.012908           | 0.000023                                      |
| H    | 0.012798           | 0.000025                                      |
| C    | -0.112306          | 0.001193                                      |

|   |           |           |
|---|-----------|-----------|
| H | 0.003639  | -0.000057 |
| C | 0.203504  | -0.001248 |
| H | -0.009734 | 0.000063  |
| C | 0.089250  | 0.002122  |
| H | -0.004751 | -0.000101 |
| C | -0.005786 | -0.001922 |
| H | -0.000703 | 0.000090  |
| C | 0.298126  | 0.001185  |
| C | -0.021788 | -0.000097 |
| H | 0.009695  | 0.000025  |
| H | 0.010257  | 0.000026  |
| H | 0.000449  | 0.000002  |
| C | -0.197372 | -0.001539 |
| H | 0.007389  | 0.000068  |
| C | 0.434374  | 0.000365  |
| H | -0.018847 | -0.000011 |
| C | -0.288009 | -0.000805 |
| H | 0.011351  | -0.000013 |
| C | 0.484084  | 0.002391  |
| C | -0.035214 | -0.000208 |
| H | 0.009585  | 0.000034  |
| H | 0.019673  | 0.000154  |
| H | 0.003061  | 0.000019  |
| C | -0.260417 | -0.000890 |
| H | 0.009786  | 0.000117  |
| C | 0.409833  | 0.001367  |
| H | -0.018061 | -0.000066 |
| C | -0.116431 | 0.001233  |
| C | 0.111655  | -0.000844 |
| C | -0.063428 | 0.000809  |
| C | 0.107055  | -0.001716 |
| C | -0.064137 | 0.000804  |
| C | 0.102264  | -0.001569 |
| H | -0.004302 | 0.000063  |
| H | 0.002331  | -0.000029 |
| H | 0.002287  | 0.000016  |
| H | -0.004822 | 0.000123  |
| C | -0.005027 | 0.000042  |
| H | 0.000158  | -0.000011 |
| H | 0.001986  | 0.000027  |
| O | 0.002398  | 0.000307  |
| C | 0.000249  | -0.000080 |
| O | 0.000320  | 0.000004  |
| C | 0.000468  | 0.001120  |
| C | -0.000011 | -0.000285 |
| C | 0.000058  | 0.000807  |
| C | -0.000023 | -0.000147 |
| C | 0.000099  | 0.001257  |
| C | -0.000219 | -0.002331 |
| H | 0.000010  | 0.000038  |
| H | 0.000002  | -0.000033 |
| H | 0.000004  | 0.000026  |
| H | -0.000003 | -0.000067 |
| C | 0.002273  | 0.018021  |
| C | -0.000820 | 0.023781  |
| C | 0.000976  | 0.002199  |
| C | -0.000920 | 0.009536  |
| C | 0.001306  | 0.016561  |
| N | -0.000244 | 0.010437  |
| C | -0.000622 | 0.018678  |
| N | 0.001038  | 0.001430  |

|   |           |           |
|---|-----------|-----------|
| C | -0.001273 | -0.004581 |
| C | 0.000137  | 0.008651  |
| C | -0.000451 | -0.000652 |
| C | 0.002881  | -0.001730 |
| C | -0.001190 | -0.020040 |
| N | 0.000552  | -0.006375 |
| C | 0.000696  | -0.027871 |
| C | -0.000848 | -0.003980 |
| C | 0.000788  | -0.010419 |
| C | -0.003182 | 0.004299  |
| C | 0.001717  | 0.003809  |
| N | -0.001294 | -0.002078 |
| C | 0.000478  | -0.022042 |
| C | 0.002892  | 0.003207  |
| C | -0.002444 | -0.011239 |
| C | -0.001282 | -0.011599 |
| C | 0.000226  | 0.001679  |
| C | -0.000222 | -0.001063 |
| C | 0.000196  | 0.000173  |
| C | -0.000104 | -0.000878 |
| C | 0.000147  | 0.000277  |
| C | -0.000226 | -0.000959 |
| C | -0.000010 | 0.000060  |
| C | -0.000269 | 0.000235  |
| C | 0.000121  | -0.000283 |
| C | -0.000061 | -0.000302 |
| C | 0.000082  | -0.000038 |
| C | -0.000050 | -0.000049 |
| C | 0.000135  | 0.000168  |
| C | -0.000006 | 0.000003  |
| C | 0.000528  | -0.000752 |
| C | 0.002005  | 0.000181  |
| C | 0.000135  | -0.000250 |
| C | -0.000070 | 0.000172  |
| C | 0.000024  | 0.000140  |
| C | -0.000093 | 0.000783  |
| C | 0.000019  | -0.000014 |
| H | -0.000007 | 0.000031  |
| H | -0.001497 | -0.000134 |
| H | 0.000021  | -0.000127 |
| H | -0.000080 | 0.000130  |
| H | -0.000004 | -0.000004 |
| H | 0.000021  | -0.000040 |
| H | 0.000699  | -0.000003 |
| H | -0.000000 | -0.000391 |
| H | 0.000005  | 0.000009  |
| H | -0.000035 | -0.000202 |
| H | -0.000008 | 0.000046  |
| H | 0.000034  | -0.000488 |
| H | -0.000027 | 0.000538  |
| H | 0.000004  | -0.000002 |
| H | 0.000033  | 0.000289  |
| H | 0.000073  | 0.000487  |
| H | -0.000073 | -0.000041 |
| H | -0.000005 | 0.000000  |
| H | 0.000000  | 0.000058  |
| H | 0.000004  | 0.000061  |
| H | -0.000003 | -0.000026 |
| H | -0.000011 | -0.000021 |
| H | 0.000022  | -0.000039 |
| H | 0.000001  | 0.000005  |

|   |           |           |
|---|-----------|-----------|
| H | -0.000004 | 0.000008  |
| H | -0.000001 | 0.000001  |
| H | 0.000038  | -0.000001 |
| H | -0.000088 | -0.000031 |
| H | -0.000022 | -0.000039 |
| H | 0.000001  | -0.000001 |
| H | 0.000004  | -0.000005 |
| H | 0.000001  | 0.000001  |

## S7. Shape dependence of T-S spectra on the Gaussian broadening parameter

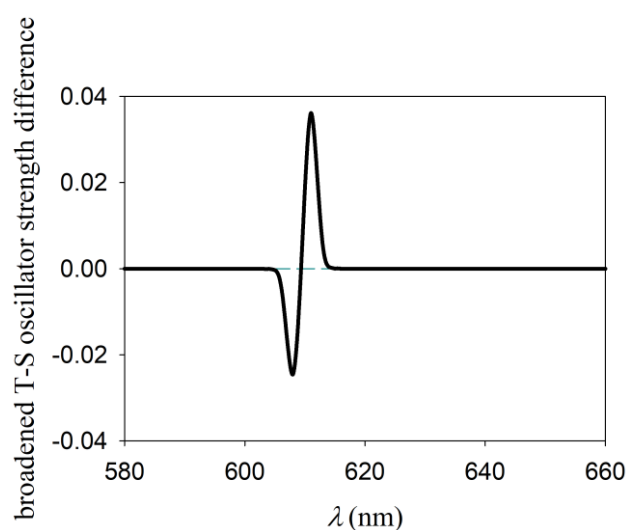

**Fig. S4** T-S spectrum as in Fig. 5b but using a Gaussian broadening with a width parameter of 1 nm.

## S8. Additional NTOs and excited states for the molecular models from LHCII

In the following tables, the electronic excitations in the relevant spectral range (i.e., with wavelengths relatively close to 650 nm) and with large oscillator strengths are highlighted in blue. The excitations with such properties but characterized by a borderline value of spin contamination (appreciably larger than 10%) are marked in dark gray. TDDFT at the wB97X-D/6-31g\* level of computational accuracy is used unless otherwise specified.



**Table S8**  $\lambda$ ,  $f$  and  $\Sigma$  values for the singlet (S) and triplet (T) electronic excitations in the M system surrounded by a PCM with a (relative) dielectric constant typical of protein interiors (p) or THF. The excitations in Table 2 are included.

| $\lambda_S^{M,p}$ | $f_S^{M,p}$ | $\lambda_T^{M,p}$ | $f_T^{M,p}$ | $\Sigma_T^{M,p}$ | $\lambda_S^{M,THF}$ | $f_S^{M,THF}$ | $\lambda_T^{M,THF}$ | $f_T^{M,THF}$ | $\Sigma_T^{M,THF}$ |
|-------------------|-------------|-------------------|-------------|------------------|---------------------|---------------|---------------------|---------------|--------------------|
| 652.11            | 0.7357      | 2118.50           | 0.0010      | 2.145            | 656.24              | 0.7637        | 2127.83             | 0.0010        | 2.141              |
| 643.19            | 0.1818      | 1776.76           | 0.0410      | 2.164            | 645.65              | 0.2120        | 1766.78             | 0.0467        | 2.168              |
| 632.62            | 0.0859      | 1605.33           | 0.0000      | 4.052            | 637.65              | 0.0891        | 1560.80             | 0.0000        | 4.051              |
| 530.83            | 0.0104      | 1572.66           | 0.0000      | 4.051            | 530.79              | 0.0120        | 1546.26             | 0.0000        | 4.050              |
| 528.45            | 0.0140      | 1267.28           | 0.0000      | 4.052            | 527.92              | 0.0176        | 1242.62             | 0.0000        | 4.051              |
| 524.21            | 0.0169      | 1051.70           | 0.0000      | 4.052            | 524.92              | 0.0213        | 1033.51             | 0.0000        | 4.051              |
| 432.28            | 2.2933      | 1019.54           | 0.0000      | 4.051            | 437.00              | 2.3956        | 1014.24             | 0.0000        | 4.050              |
| 408.93            | 0.5379      | 695.81            | 0.0000      | 4.052            | 410.45              | 0.4603        | 690.22              | 0.0000        | 4.051              |
| 396.58            | 0.0891      | 684.49            | 0.0528      | 2.113            | 398.31              | 0.1331        | 679.51              | 0.0382        | 2.205              |
| 389.14            | 0.4828      | 680.76            | 0.0086      | 2.219            | 394.26              | 0.6066        | 675.77              | 0.0454        | 2.129              |
| 388.91            | 0.4315      | 652.96            | 0.0000      | 4.052            | 390.76              | 1.1673        | 651.72              | 0.0000        | 4.051              |
| 385.44            | 0.2175      | 644.23            | 0.4870      | 2.064            | 386.58              | 0.0491        | 646.69              | 0.5250        | 2.060              |
| 380.89            | 0.0283      | 639.19            | 0.2704      | 2.134            | 383.60              | 1.2123        | 642.95              | 0.2299        | 2.088              |
| 380.41            | 1.4711      | 637.28            | 0.0031      | 4.024            | 382.27              | 0.0071        | 636.70              | 0.0152        | 2.505              |
| 367.89            | 0.6226      | 634.36            | 0.0031      | 2.499            | 369.18              | 0.8512        | 635.33              | 0.0004        | 4.035              |
| 363.90            | 1.7837      | 627.16            | 0.0491      | 2.413            | 365.64              | 1.9757        | 626.33              | 0.0760        | 2.411              |
| 360.74            | 0.6613      | 581.37            | 0.0002      | 2.076            | 363.71              | 0.3422        | 584.70              | 0.0001        | 2.073              |
| 354.50            | 1.2501      | 563.14            | 0.0450      | 2.166            | 356.70              | 1.1226        | 562.52              | 0.0530        | 2.164              |
| 348.45            | 0.3580      | 536.19            | 0.0000      | 4.052            | 351.20              | 0.3356        | 532.65              | 0.0000        | 4.050              |
| 346.64            | 0.1574      | 528.44            | 0.0118      | 2.052            | 349.67              | 0.1438        | 527.92              | 0.0136        | 2.051              |

For  $M_{612} \equiv \{\text{Lut620}, \text{Chl}a612\}$ , we find only one singlet transition with these properties and no triplet transition with acceptable spin contamination which also has a significant  $f$  value (see below). The  $T_1$  state was instead determined with a  $\Sigma$  value well within the acceptance range, that is, 2.05 in both environmental models used. Forcing the electron density to be distributed on  $M_{612}$  through a TDDFT

study of the isolated pigment pair changes the electronic structure properties of the transitions to some extent, compared to those occurring in system M, due to the removal of the excitonic coupling effects. In fact, we reach the same conclusion from inspection of the other two pigment pairs contained in M, which stresses the nonnegligible exciton coupling effects in system M.

**Table S9**  $\lambda$ ,  $f$ , and  $\Sigma$  values for the electronic excitations in model system  $M_{612}$  surrounded by a PCM with dielectric constants typical of protein interiors (p) and THF solvent.

| $\lambda_S^{M_{612},P}$ | $f_S^{M_{612},P}$ | $\lambda_T^{M_{612},P}$ | $f_T^{M_{612},P}$ | $\Sigma_T^{M_{612},P}$ | $\lambda_S^{M_{612},THF}$ | $f_S^{M_{612},THF}$ | $\lambda_T^{M_{612},THF}$ | $f_T^{M_{612},THF}$ | $\Sigma_T^{M_{612},THF}$ |
|-------------------------|-------------------|-------------------------|-------------------|------------------------|---------------------------|---------------------|---------------------------|---------------------|--------------------------|
| 634.52                  | 0.2958            | 2059.44                 | 0.0014            | 2.139                  | 639.34                    | 0.3170              | 2086.68                   | 0.0014              | 2.133                    |
| 522.83                  | 0.0216            | 1750.49                 | 0.0306            | 2.155                  | 523.66                    | 0.0263              | 1744.19                   | 0.0355              | 2.162                    |
| 430.75                  | 2.2302            | 1267.52                 | 0.0000            | 4.046                  | 435.42                    | 2.3816              | 1244.03                   | 0.0000              | 4.044                    |
| 408.73                  | 0.6273            | 695.36                  | 0.0069            | 2.262                  | 409.80                    | 0.5052              | 692.06                    | 0.0062              | 2.208                    |
| 383.00                  | 1.5602            | 693.32                  | 0.0001            | 3.991                  | 388.05                    | 1.7674              | 688.21                    | 0.0000              | 4.032                    |
| 366.29                  | 0.7544            | 652.69                  | 0.0064            | 2.135                  | 367.22                    | 0.6861              | 651.90                    | 0.0070              | 2.138                    |
| 349.89                  | 0.9723            | 641.28                  | 0.0016            | 2.502                  | 352.97                    | 0.9444              | 642.14                    | 0.0053              | 2.500                    |
| 327.59                  | 0.0043            | 627.26                  | 0.1680            | 2.469                  | 327.14                    | 0.0039              | 623.91                    | 0.1801              | 2.455                    |
| 322.80                  | 0.0051            | 561.58                  | 0.0534            | 2.147                  | 323.74                    | 0.0040              | 561.35                    | 0.0621              | 2.146                    |
| 317.26                  | 0.0244            | 514.40                  | 0.0919            | 2.143                  | 316.82                    | 0.0180              | 516.06                    | 0.1157              | 2.121                    |
| 313.83                  | 0.0107            | 506.67                  | 0.0010            | 3.819                  | 315.06                    | 0.0175              | 504.28                    | 0.0004              | 3.733                    |
| 308.37                  | 0.0119            | 495.02                  | 0.0032            | 2.309                  | 311.32                    | 0.0110              | 494.06                    | 0.0040              | 2.403                    |
| 297.06                  | 0.1596            | 473.81                  | 0.2186            | 2.712                  | 297.05                    | 0.2342              | 472.83                    | 0.2409              | 2.708                    |
| 295.11                  | 0.2198            | 427.79                  | 1.5536            | 2.470                  | 295.22                    | 0.1547              | 431.54                    | 2.5269              | 2.167                    |
| 290.79                  | 0.0029            | 424.66                  | 0.0370            | 2.352                  | 290.98                    | 0.0030              | 427.53                    | 0.0024              | 2.350                    |
| 286.41                  | 0.0033            | 420.59                  | 1.7607            | 2.879                  | 286.30                    | 0.0035              | 420.83                    | 0.9282              | 3.102                    |
| 281.41                  | 0.1101            | 403.05                  | 0.0513            | 2.136                  | 281.19                    | 0.1093              | 403.40                    | 0.0607              | 2.140                    |
| 274.63                  | 0.1095            | 398.70                  | 0.1441            | 2.254                  | 274.76                    | 0.1081              | 399.82                    | 0.1344              | 2.258                    |
| 270.03                  | 0.0048            | 390.09                  | 0.4898            | 2.511                  | 269.96                    | 0.0063              | 391.51                    | 0.5110              | 2.510                    |
| 266.68                  | 0.0756            | 379.19                  | 0.0696            | 2.236                  | 266.98                    | 0.0585              | 381.52                    | 0.0845              | 2.217                    |

$S_0 \rightarrow S_1$

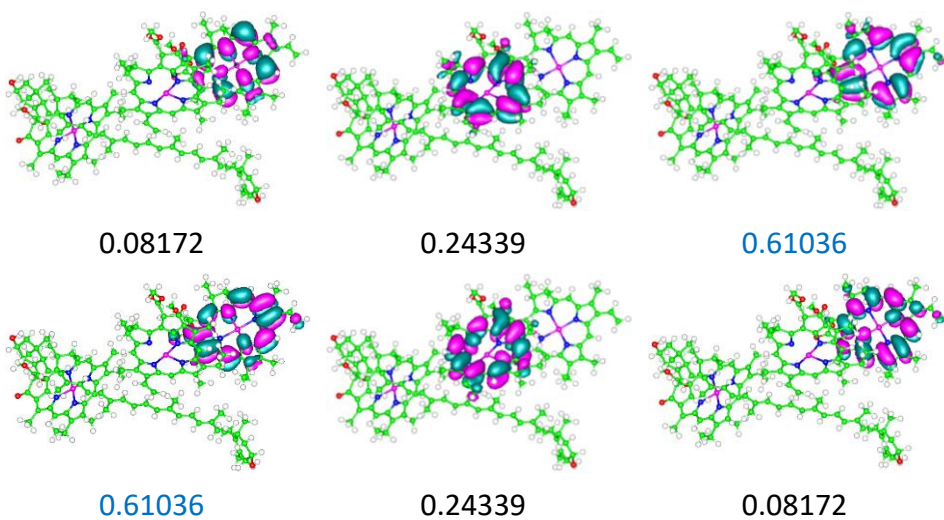

$S_0 \rightarrow S_2$

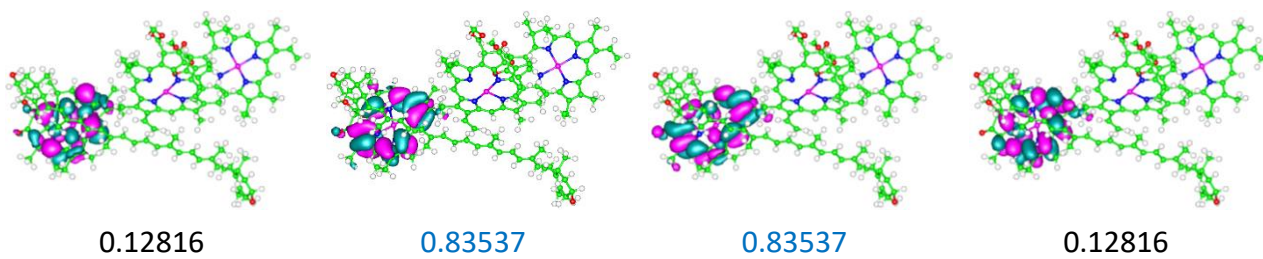

$T_1^\alpha \rightarrow T_6^\alpha$

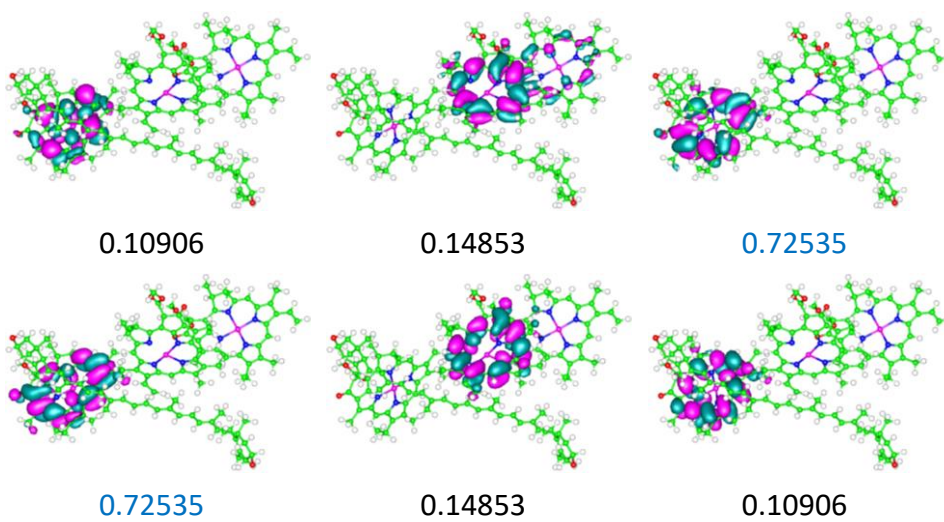

$T_1^\beta \rightarrow T_6^\beta$

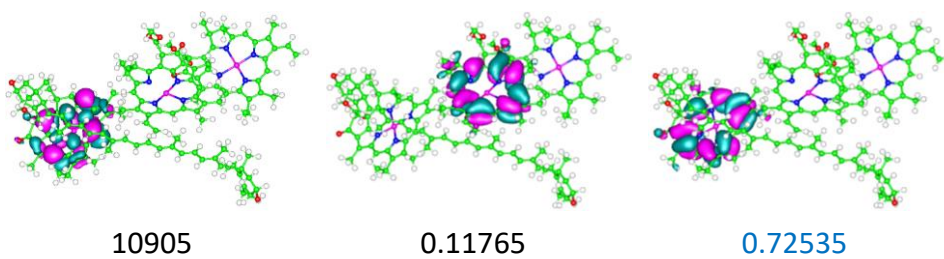

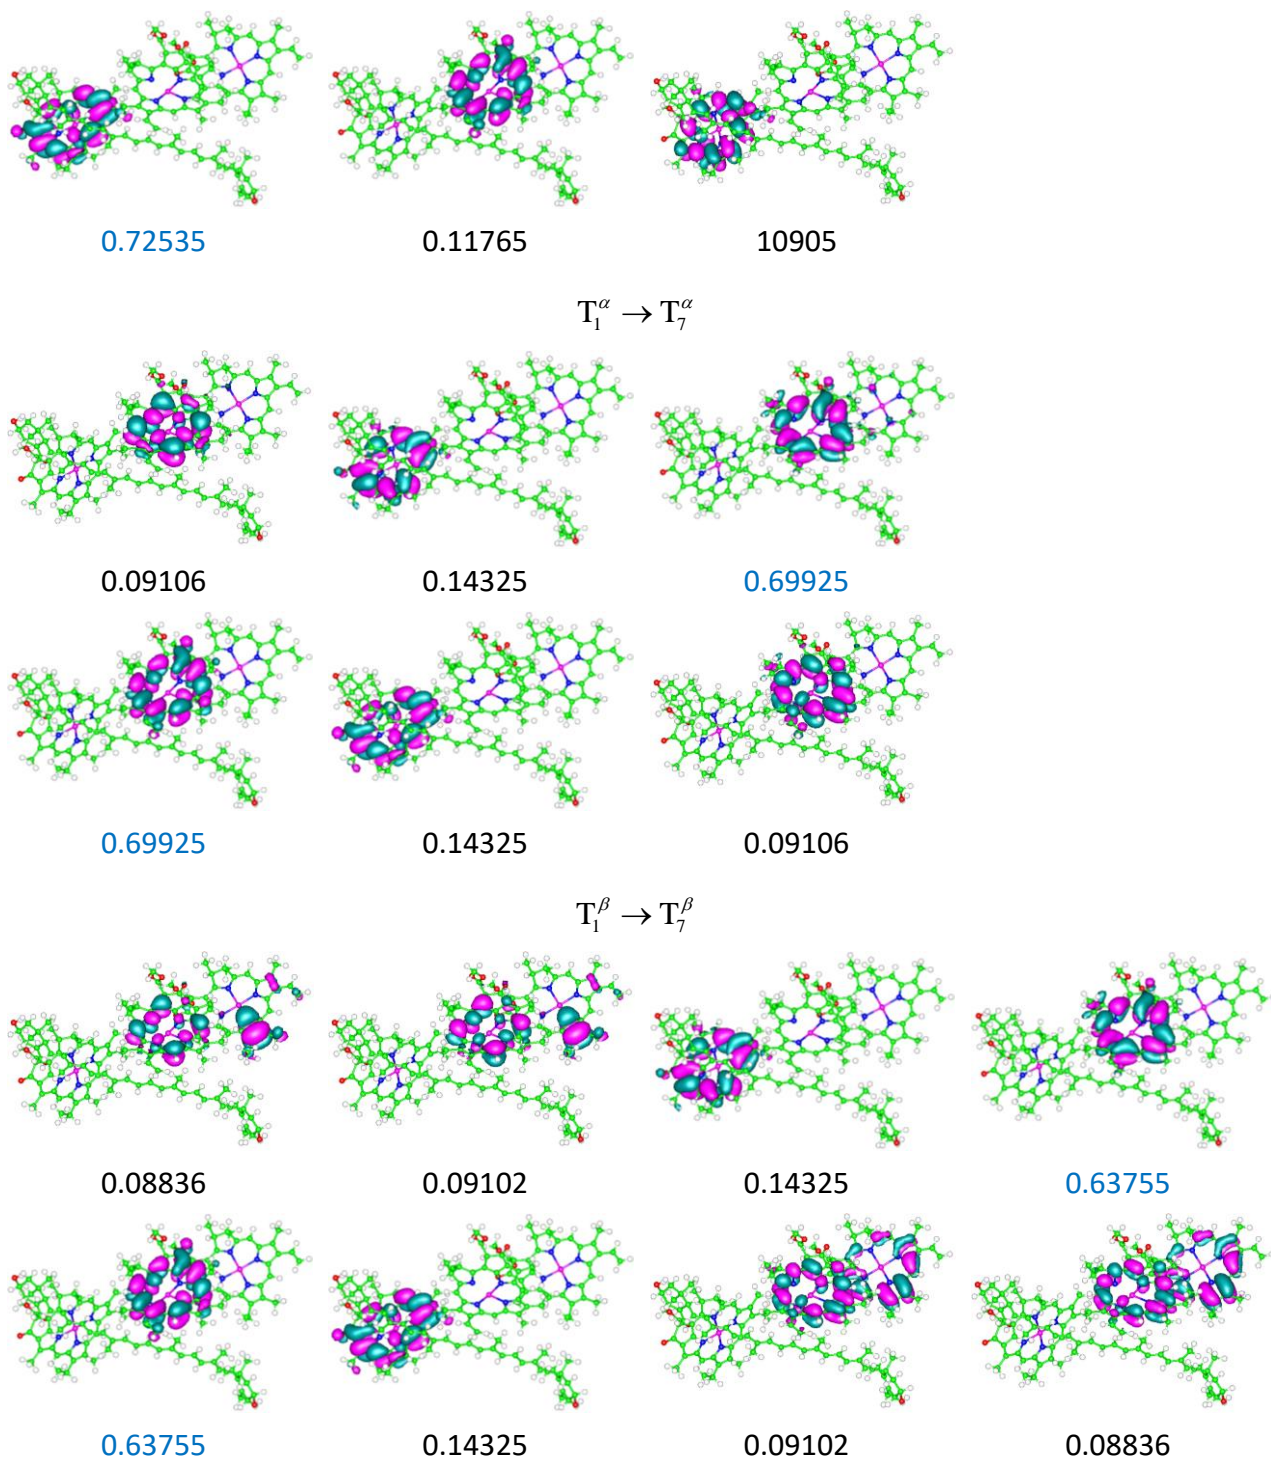

**Fig. S5** NTOs most representative of the indicated electronic excitations for the M system in THF (cf. Fig. 7). The weights for the highest occupied and lowest unoccupied NTOs are highlighted in blue. The isovalue 0.02 is shown.

**Table S10**  $\lambda$ ,  $f$ , and  $\Sigma$  values for the electronic excitations in systems  $M_{612}$  and  $M$  surrounded by a PCM with a dielectric constant typical of solvated-protein surfaces ( $\epsilon_s = 20^5$ ).

| $\lambda_S^{M_{612},s}$ | $f_S^{M_{612},s}$ | $\lambda_T^{M_{612},s}$ | $f_T^{M_{612},s}$ | $\Sigma_T^{M_{612},s}$ | $\lambda_S^{M,s}$ | $f_S^{M,s}$ | $\lambda_T^{M,s}$ | $f_T^{M,s}$ | $\Sigma_T^{M,s}$ |
|-------------------------|-------------------|-------------------------|-------------------|------------------------|-------------------|-------------|-------------------|-------------|------------------|
| 634.57                  | 0.2984            | 2116.31                 | 0.0015            | 2.125                  | 652.04            | 0.7449      | 2145.40           | 0.0008      | 2.128            |
| 524.35                  | 0.0270            | 1676.35                 | 0.0321            | 2.168                  | 642.61            | 0.1858      | 1685.43           | 0.0428      | 2.178            |
| 430.94                  | 2.2079            | 1262.81                 | 0.0000            | 4.046                  | 632.45            | 0.0828      | 1599.02           | 0.0000      | 4.053            |
| 409.36                  | 0.6434            | 697.84                  | 0.0061            | 2.216                  | 531.20            | 0.0121      | 1578.19           | 0.0000      | 4.052            |
| 384.27                  | 1.4866            | 692.27                  | 0.0000            | 4.040                  | 529.56            | 0.0183      | 1262.30           | 0.0000      | 4.053            |
| 367.65                  | 0.7689            | 654.71                  | 0.0058            | 2.138                  | 525.08            | 0.0228      | 1054.02           | 0.0000      | 4.053            |
| 350.84                  | 0.9862            | 648.62                  | 0.0020            | 2.487                  | 432.74            | 2.2215      | 1018.74           | 0.0000      | 4.052            |
| 327.06                  | 0.0031            | 635.27                  | 0.1842            | 2.432                  | 410.72            | 0.6103      | 694.43            | 0.0000      | 4.053            |
| 318.77                  | 0.0289            | 562.27                  | 0.0608            | 2.154                  | 396.22            | 0.0758      | 688.42            | 0.0417      | 2.205            |
| 317.02                  | 0.0059            | 511.48                  | 0.0967            | 2.136                  | 391.92            | 0.2489      | 684.61            | 0.0458      | 2.143            |
| 313.55                  | 0.0101            | 505.72                  | 0.0012            | 3.904                  | 389.95            | 0.5862      | 652.26            | 0.0000      | 4.053            |
| 308.34                  | 0.0113            | 491.32                  | 0.0020            | 2.218                  | 387.45            | 0.1838      | 646.40            | 0.0042      | 2.503            |
| 298.88                  | 0.0506            | 479.30                  | 0.1820            | 2.779                  | 383.41            | 0.0060      | 644.49            | 0.5982      | 2.120            |
| 296.61                  | 0.3740            | 427.97                  | 1.4610            | 2.521                  | 381.68            | 1.3713      | 640.81            | 0.1246      | 2.164            |
| 291.27                  | 0.0030            | 421.11                  | 1.8838            | 2.857                  | 369.77            | 0.4983      | 635.37            | 0.0010      | 4.042            |
| 287.19                  | 0.0050            | 412.64                  | 0.0155            | 2.329                  | 365.77            | 1.7447      | 632.62            | 0.0791      | 2.244            |
| 281.41                  | 0.1167            | 404.32                  | 0.0503            | 2.135                  | 362.27            | 0.7158      | 589.85            | 0.0001      | 2.076            |
| 277.48                  | 0.1113            | 400.46                  | 0.1260            | 2.244                  | 355.47            | 1.4355      | 563.20            | 0.0499      | 2.169            |
| 270.02                  | 0.0036            | 390.59                  | 0.4768            | 2.509                  | 350.08            | 0.4303      | 540.08            | 0.0000      | 4.053            |
| 267.77                  | 0.0351            | 382.27                  | 0.0743            | 2.244                  | 347.40            | 0.1354      | 529.56            | 0.0160      | 2.053            |



$S_0 \rightarrow S_1$

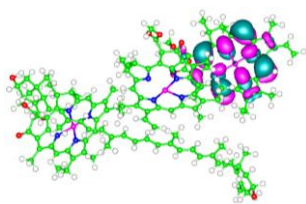

0.08449

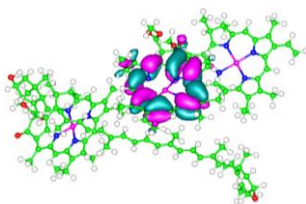

0.23653

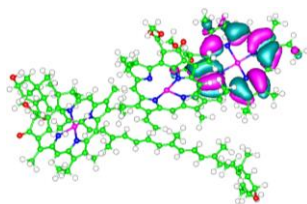

0.59806

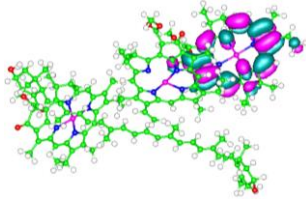

0.59806

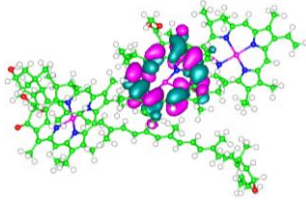

0.23653

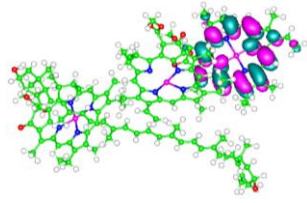

0.08449

$S_0 \rightarrow S_2$

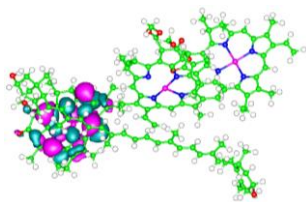

13266

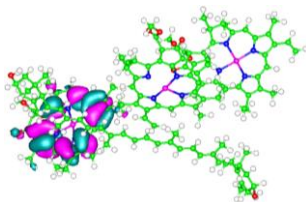

0.81524

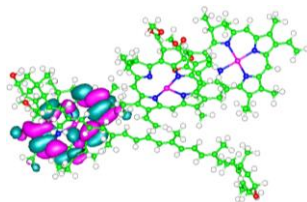

0.81524

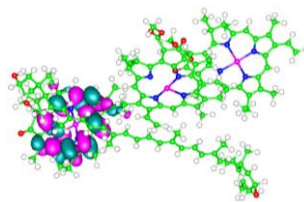

13266

$T_1^\alpha \rightarrow T_6^\alpha$

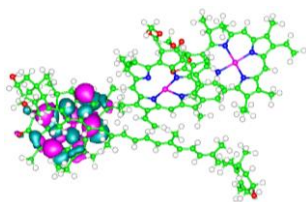

0.08466

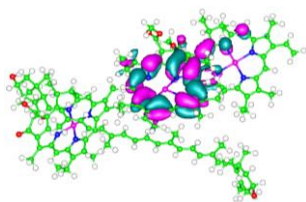

0.09566

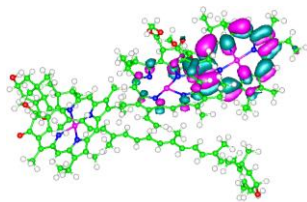

0.41093

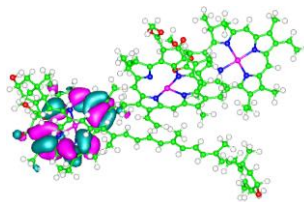

0.53784

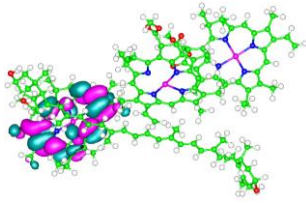

0.53784

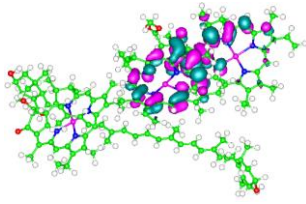

0.41093

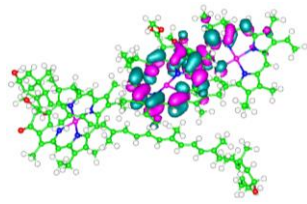

0.09566

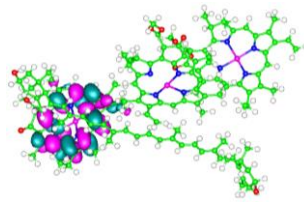

0.08466

$T_1^\beta \rightarrow T_6^\beta$

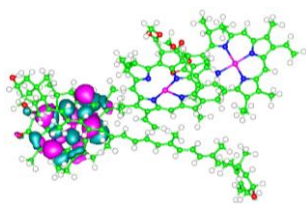

0.08466

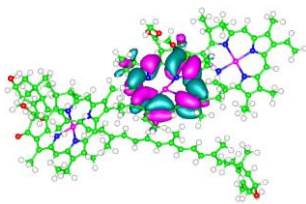

0.13115

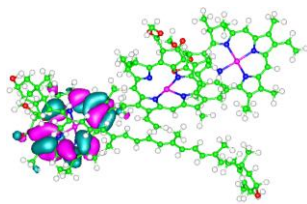

0.53778

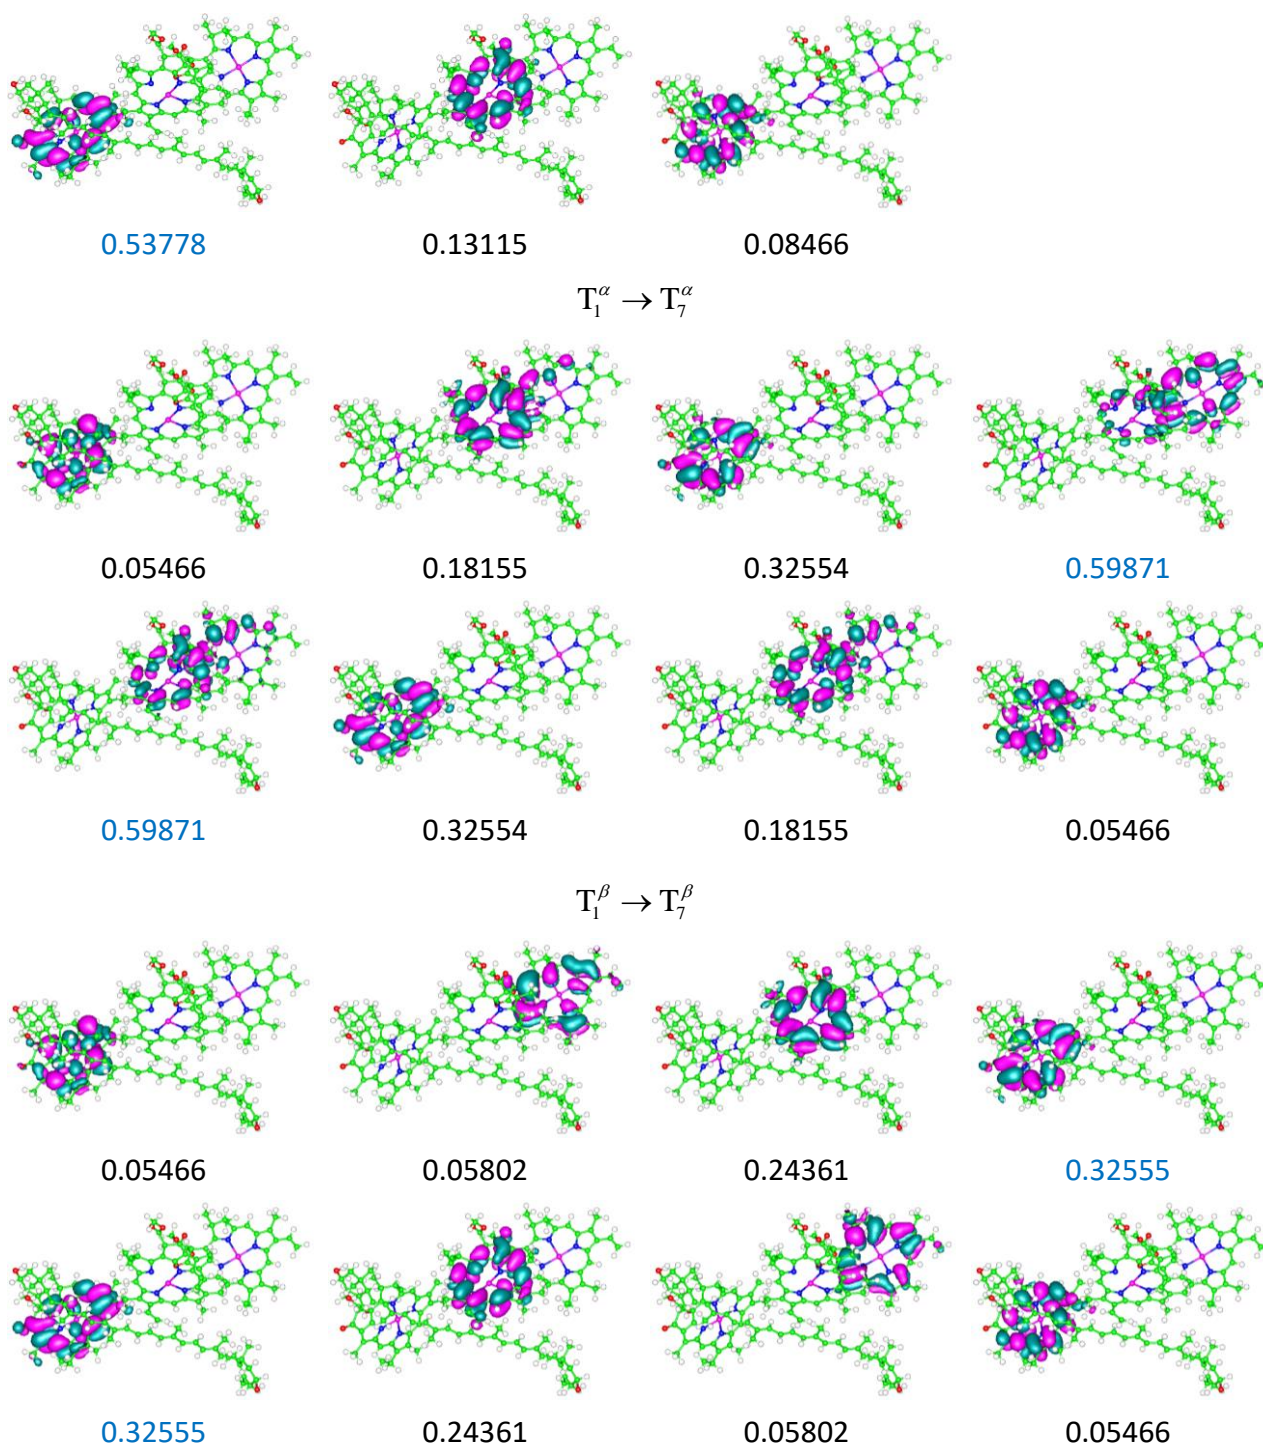

**Fig. S6** The analogue of Fig. S5 for the M system in a PCM modeling solvated-protein surfaces.

**Table S11**  $\lambda$ ,  $f$ , and  $\Sigma$  values for the electronic excitations in systems  $M_{612}$  and  $M$  in vacuum.

| $\lambda_S^{M_{612},v}$ | $f_S^{M_{612},v}$ | $\lambda_T^{M_{612},v}$ | $f_T^{M_{612},v}$ | $\Sigma_T^{M_{612},v}$ | $\lambda_S^{M,v}$ | $f_S^{M,v}$ | $\lambda_T^{M,v}$ | $f_T^{M,v}$ | $\Sigma_T^{M,v}$ |
|-------------------------|-------------------|-------------------------|-------------------|------------------------|-------------------|-------------|-------------------|-------------|------------------|
| 622.69                  | 0.2125            | 2034.82                 | 0.0044            | 2.202                  | 640.24            | 0.5723      | 2117.90           | 0.0055      | 2.207            |
| 520.25                  | 0.0089            | 1835.18                 | 0.0168            | 2.097                  | 630.89            | 0.1396      | 1871.95           | 0.0241      | 2.109            |
| 419.36                  | 1.5943            | 1276.56                 | 0.0000            | 4.045                  | 621.62            | 0.0493      | 1608.25           | 0.0000      | 4.051            |
| 401.96                  | 0.8539            | 695.42                  | 0.0000            | 4.044                  | 528.47            | 0.0044      | 1567.46           | 0.0000      | 4.051            |
| 370.79                  | 1.1963            | 685.87                  | 0.0061            | 2.214                  | 525.52            | 0.0049      | 1275.43           | 0.0000      | 4.051            |
| 357.22                  | 1.0852            | 639.99                  | 0.0046            | 2.137                  | 521.73            | 0.0063      | 1046.38           | 0.0000      | 4.051            |
| 341.63                  | 0.8547            | 625.67                  | 0.0011            | 2.500                  | 422.22            | 1.6660      | 1021.05           | 0.0000      | 4.051            |
| 335.10                  | 0.0162            | 610.21                  | 0.0904            | 2.567                  | 403.57            | 0.6896      | 697.97            | 0.0000      | 4.051            |
| 330.72                  | 0.0265            | 560.24                  | 0.0334            | 2.146                  | 399.70            | 0.0168      | 694.52            | 0.0125      | 2.082            |
| 315.13                  | 0.0277            | 518.98                  | 0.0440            | 2.187                  | 379.43            | 0.2624      | 672.79            | 0.0094      | 2.239            |
| 311.94                  | 0.0145            | 511.65                  | 0.0067            | 2.679                  | 376.37            | 0.4293      | 654.97            | 0.0000      | 4.051            |
| 298.99                  | 0.0148            | 503.92                  | 0.0013            | 3.444                  | 373.91            | 0.0180      | 639.89            | 0.0001      | 4.050            |
| 295.74                  | 0.2088            | 457.70                  | 0.1192            | 2.486                  | 373.55            | 0.1985      | 632.11            | 0.3948      | 2.065            |
| 288.36                  | 0.0523            | 455.50                  | 0.0919            | 2.473                  | 369.38            | 0.9763      | 628.32            | 0.1800      | 2.082            |
| 287.65                  | 0.0030            | 422.70                  | 0.1750            | 3.037                  | 360.59            | 0.5071      | 617.33            | 0.0090      | 2.471            |
| 285.05                  | 0.0420            | 410.06                  | 2.6384            | 2.300                  | 355.45            | 2.2442      | 610.98            | 0.0259      | 2.569            |
| 280.72                  | 0.1037            | 396.98                  | 0.0476            | 2.139                  | 353.44            | 0.2562      | 562.67            | 0.0185      | 2.143            |
| 269.70                  | 0.0050            | 395.62                  | 0.2936            | 2.236                  | 347.71            | 1.1795      | 557.96            | 0.0104      | 2.106            |
| 269.00                  | 0.0990            | 384.96                  | 0.3400            | 2.520                  | 341.28            | 0.4131      | 530.62            | 0.0000      | 4.051            |
| 264.45                  | 0.0947            | 378.53                  | 0.0001            | 4.044                  | 338.69            | 0.1874      | 525.58            | 0.0060      | 2.066            |



$S_0 \rightarrow S_1$

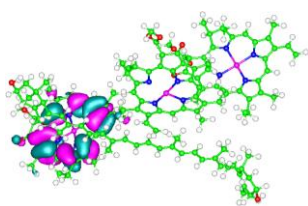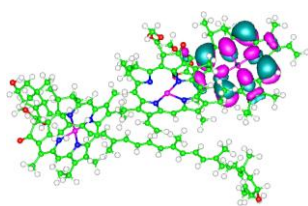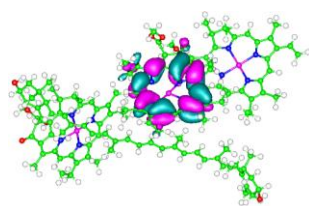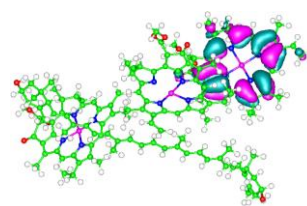

0.05576

0.09201

0.26412

0.54504

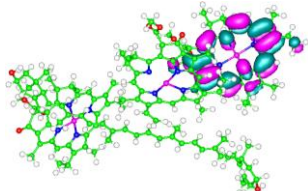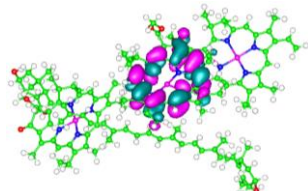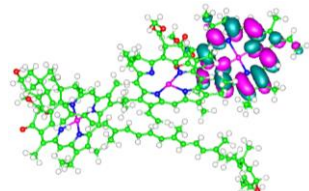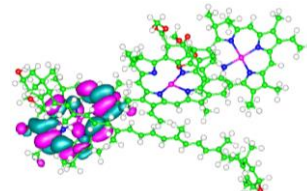

0.54504

0.26412

0.09201

0.05576

$S_0 \rightarrow S_2$

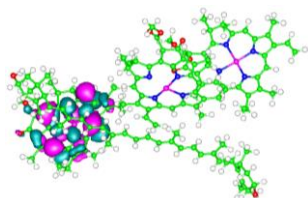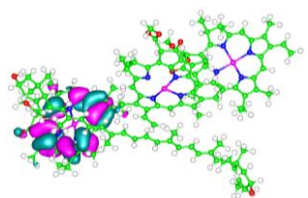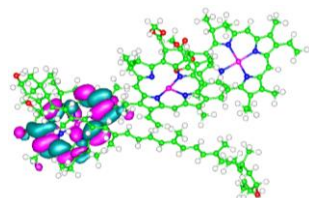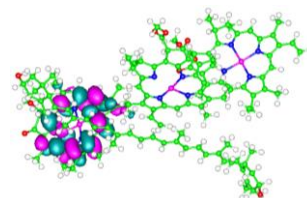

0.15009

0.78806

0.78806

0.15009

$T_1^\alpha \rightarrow T_6^\alpha$

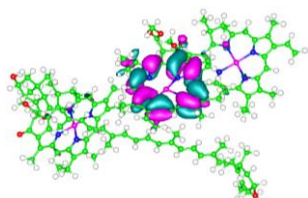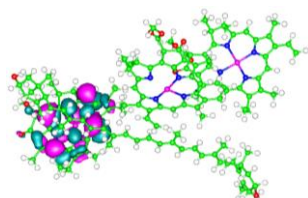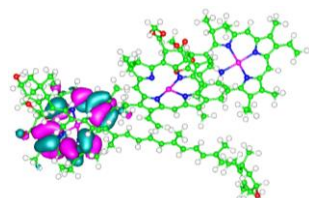

0.12763

0.13001

0.69906

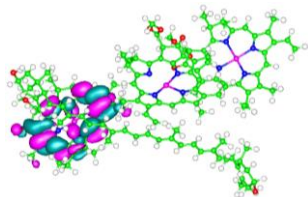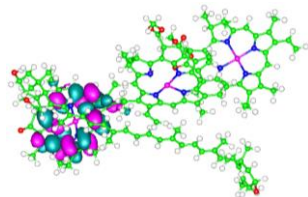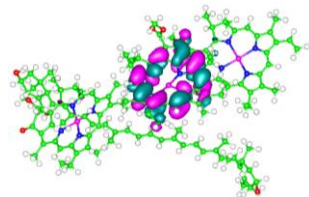

0.69906

0.13001

0.12763

$T_1^\beta \rightarrow T_6^\beta$

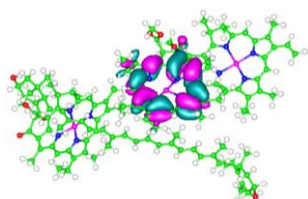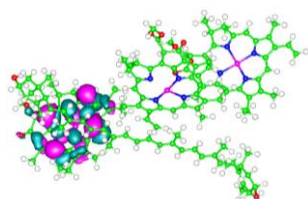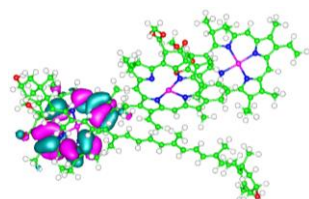

0.12135

0.12995

0.69906

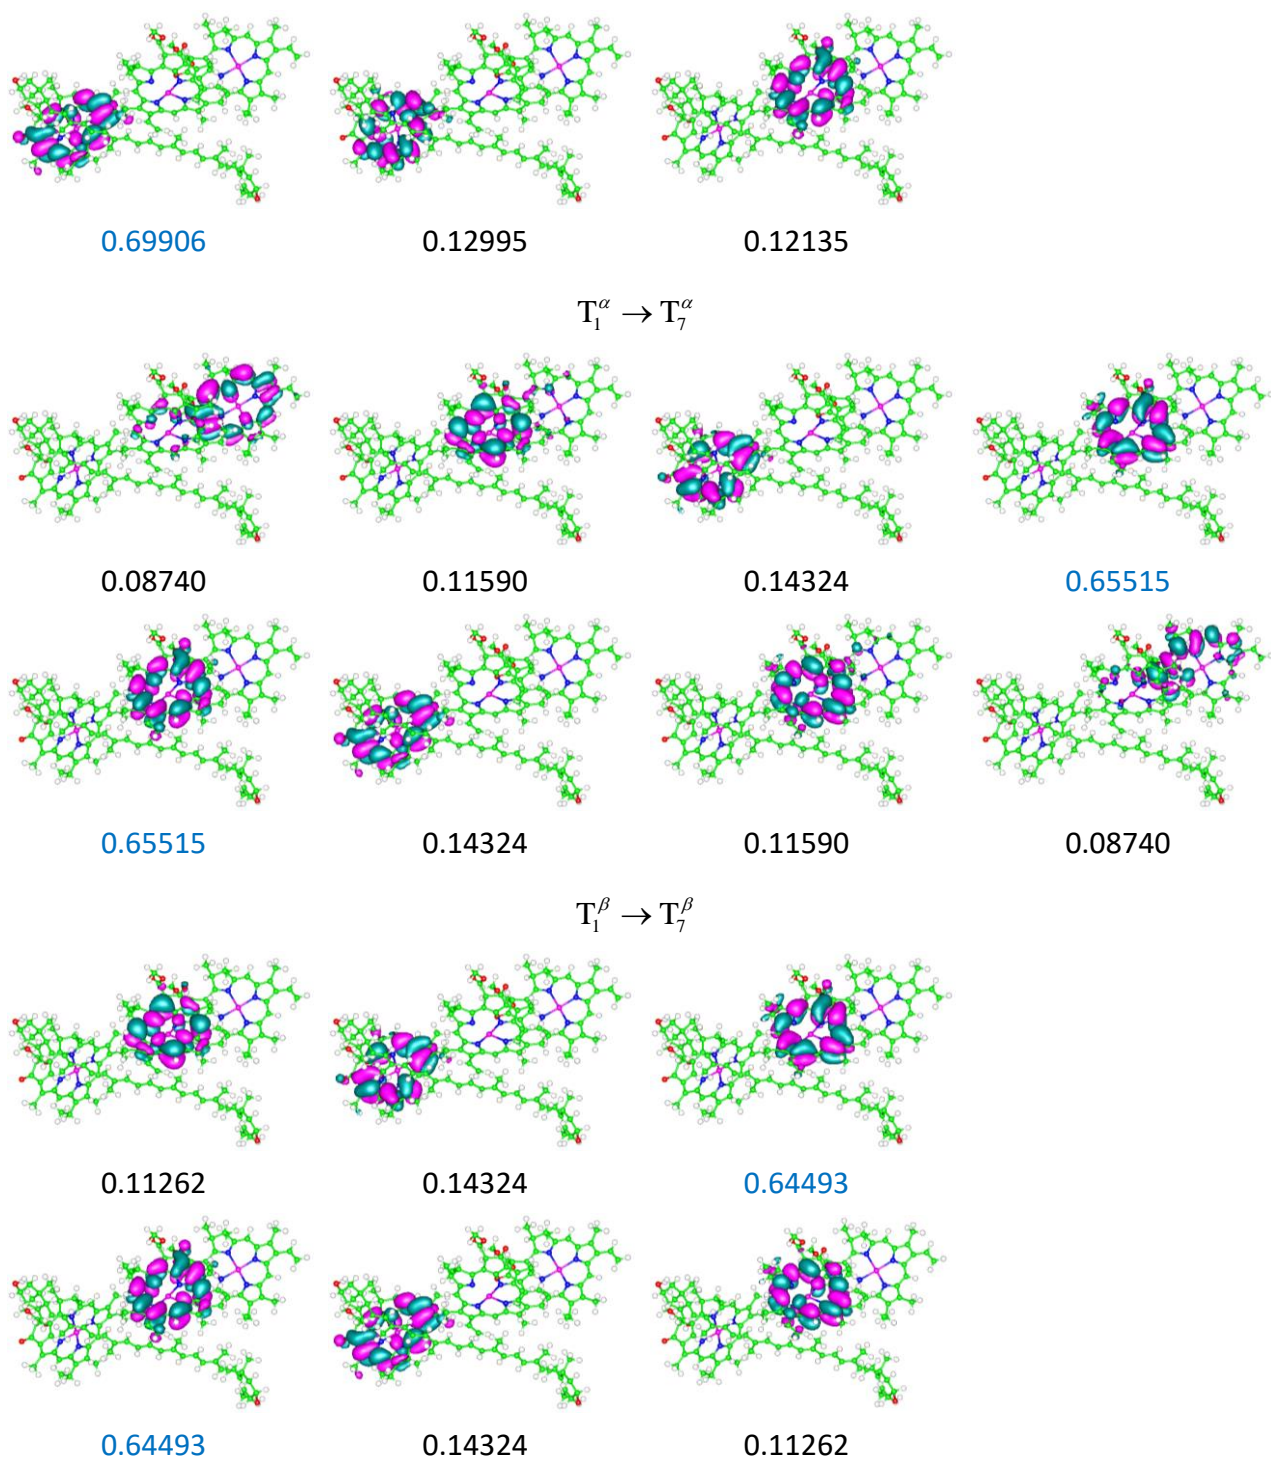

**Fig. S7** The analogue of Fig. S5 for the M system in vacuum.

**Table S12**  $\lambda$ ,  $f$  and  $\Sigma$  values for the singlet (S) and triplet (T) electronic excitations in the M' and M'' systems surrounded in protein interior-like environment. The excitations in Table 3 are included.

| $\lambda_p^{M',S}$ | $f_p^{M',S}$  | $\lambda_p^{M',T}$ | $f_p^{M',T}$  | $\Sigma_p^{M',T}$ | $\lambda_p^{M'',S}$ | $f_p^{M'',S}$ | $\lambda_p^{M'',T}$ | $f_p^{M'',T}$ | $\Sigma_p^{M'',T}$ |
|--------------------|---------------|--------------------|---------------|-------------------|---------------------|---------------|---------------------|---------------|--------------------|
| 864.01             | 3.1355        | 1626.86            | 0.0000        | 4.215             | 902.90              | 2.8464        | 1626.30             | 0.0000        | 4.220              |
| 693.72             | 0.0277        | 1605.22            | 0.0000        | 4.194             | 693.07              | 0.3536        | 1582.57             | 0.0000        | 4.218              |
| <b>651.30</b>      | <b>0.6619</b> | 1602.96            | 0.0000        | 4.215             | <b>650.03</b>       | <b>0.6438</b> | 1571.19             | 0.0000        | 4.208              |
| <b>642.50</b>      | <b>0.2117</b> | 1088.34            | 0.0000        | 4.215             | <b>646.26</b>       | <b>0.0974</b> | 1088.25             | 0.0000        | 4.220              |
| <b>632.77</b>      | <b>0.0704</b> | 1047.38            | 0.0000        | 4.209             | <b>628.11</b>       | <b>0.0897</b> | 1052.42             | 0.0000        | 4.218              |
| 543.05             | 0.0752        | 1044.26            | 0.0000        | 4.215             | 603.70              | 0.0084        | 1018.31             | 0.0001        | 4.202              |
| 542.33             | 0.0009        | 784.16             | 0.0051        | 2.767             | 531.28              | 0.0078        | 758.06              | 0.0246        | 2.756              |
| 530.69             | 0.0186        | 707.51             | 0.0046        | 4.020             | 529.79              | 0.0117        | 652.90              | 0.4599        | 2.973              |
| 527.48             | 0.0117        | 656.60             | 0.4263        | 2.318             | 528.48              | 0.0103        | 652.54              | 0.2505        | 3.457              |
| 469.15             | 0.0161        | 653.01             | 0.0000        | 4.214             | 489.81              | 0.0808        | 646.01              | 0.0026        | 3.887              |
| 452.10             | 0.0218        | 644.72             | 0.0000        | 4.215             | 459.39              | 0.0819        | 645.18              | 0.0000        | 4.219              |
| 441.82             | 0.0661        | <b>644.06</b>      | <b>0.4673</b> | <b>2.277</b>      | 451.79              | 0.0292        | <b>643.71</b>       | <b>0.1983</b> | <b>2.235</b>       |
| 422.77             | 0.0132        | <b>641.35</b>      | <b>0.0269</b> | <b>2.243</b>      | 445.09              | 0.0055        | <b>633.96</b>       | <b>0.0660</b> | <b>2.235</b>       |
| 421.35             | 0.0036        | 616.60             | 0.0849        | 2.404             | 442.77              | 0.0104        | 603.80              | 0.0097        | 2.699              |
| 415.72             | 0.0028        | 543.93             | 0.0691        | 2.263             | 424.61              | 0.0020        | 538.01              | 0.0036        | 2.376              |
| 408.47             | 0.3181        | 541.87             | 0.0002        | 4.005             | 406.35              | 0.0156        | 533.63              | 0.0000        | 4.088              |
| 408.24             | 0.5537        | 537.45             | 0.0030        | 4.076             | 394.98              | 0.1909        | 530.89              | 0.0102        | 2.220              |
| 396.05             | 0.4667        | 530.70             | 0.0264        | 2.248             | 390.42              | 0.5680        | 529.51              | 0.0000        | 4.220              |
| 392.51             | 0.0611        | 530.49             | 0.0053        | 2.440             | 389.63              | 0.2457        | 528.33              | 0.0294        | 2.230              |
| 390.25             | 0.2439        | 529.04             | 0.0000        | 4.215             | 388.47              | 0.0137        | 523.19              | 0.0049        | 2.276              |

**Table S13** Properties of the singlet excited states in structure M, obtained using the M06-2X density functional. Units are as in the other tables. The excitations in Table 3 are included.

| $\lambda_p^{M,S}$ | $f_p^{M,S}$ |
|-------------------|-------------|
| 621.48            | 0.7981      |
| 612.11            | 0.2211      |
| 604.44            | 0.0804      |
| 515.95            | 0.0083      |
| 514.15            | 0.0145      |
| 512.29            | 0.0107      |
| 473.13            | 0.1935      |
| 458.95            | 0.0034      |
| 446.94            | 0.0014      |
| 441.47            | 0.0500      |
| 433.60            | 2.5675      |
| 412.27            | 0.0014      |
| 406.16            | 0.0007      |
| 392.85            | 0.1230      |
| 391.84            | 0.0954      |
| 389.17            | 0.5415      |
| 385.02            | 0.1979      |
| 384.95            | 0.3195      |
| 382.80            | 0.0010      |
| 381.49            | 1.3938      |

**Table S14** We report the same quantities as in Table S12 obtained using the M06-2X functional. The excitations in Table 3 are included.

| $\lambda_p^{M',S}$ | $f_p^{M',S}$  | $\lambda_p^{M',T}$ | $f_p^{M',T}$  | $\Sigma_p^{M',T}$ | $\lambda_p^{M'',S}$ | $f_p^{M'',S}$ | $\lambda_p^{M'',T}$ | $f_p^{M'',T}$ | $\Sigma_p^{M'',T}$ |
|--------------------|---------------|--------------------|---------------|-------------------|---------------------|---------------|---------------------|---------------|--------------------|
| 842.03             | 2.8502        | 1055.16            | 0.0000        | 4.098             | 891.66              | 2.2715        | 1054.56             | 0.0000        | 4.101              |
| 792.19             | 0.2572        | 1045.05            | 0.0000        | 4.097             | 799.30              | 0.6320        | 1041.91             | 0.0000        | 4.098              |
| 677.69             | 0.0049        | 1024.71            | 0.0004        | 3.942             | 743.29              | 0.0397        | 1041.39             | 0.0000        | 4.079              |
| <b>624.33</b>      | <b>0.6830</b> | 885.17             | 0.0019        | 3.393             | <b>623.37</b>       | <b>0.7925</b> | 831.04              | 0.0044        | 2.710              |
| <b>611.97</b>      | <b>0.3554</b> | 832.54             | 0.0020        | 3.080             | 617.62              | 0.0010        | 794.85              | 0.0000        | 4.100              |
| <b>608.45</b>      | <b>0.0173</b> | 794.63             | 0.0000        | 4.098             | <b>613.40</b>       | <b>0.2733</b> | 784.14              | 0.0001        | 4.079              |
| 576.83             | 0.0001        | 779.77             | 0.0000        | 4.090             | <b>607.82</b>       | <b>0.0163</b> | 773.85              | 0.0378        | 2.519              |
| 537.57             | 0.0523        | 763.67             | 0.0507        | 2.300             | 554.68              | 0.0462        | 762.27              | 0.0082        | 3.394              |
| 534.90             | 0.0029        | 692.47             | 0.0020        | 2.152             | 531.26              | 0.0137        | 721.17              | 0.0143        | 2.171              |
| 530.11             | 0.0051        | 638.61             | 0.0049        | 3.997             | 522.59              | 0.0016        | <b>622.95</b>       | <b>0.7553</b> | <b>2.107</b>       |
| 515.72             | 0.0147        | <b>623.06</b>      | <b>0.6541</b> | <b>2.112</b>      | 516.01              | 0.0080        | <b>613.44</b>       | <b>0.2521</b> | <b>2.126</b>       |
| 513.59             | 0.0116        | <b>611.84</b>      | <b>0.3707</b> | <b>2.101</b>      | 513.46              | 0.0191        | 611.87              | 0.0012        | 2.162              |
| 498.23             | 0.0008        | 608.09             | 0.0015        | 4.061             | 510.00              | 0.0131        | 608.40              | 0.0029        | 4.072              |
| 492.69             | 0.0481        | <b>607.75</b>      | <b>0.0366</b> | <b>2.133</b>      | 505.92              | 0.1086        | <b>606.76</b>       | <b>0.0332</b> | <b>2.169</b>       |
| 486.78             | 0.0008        | 600.52             | 0.0000        | 4.098             | 490.31              | 0.0218        | 600.99              | 0.0000        | 4.100              |
| 468.88             | 0.0018        | 590.71             | 0.0222        | 2.183             | 465.73              | 0.0011        | 600.50              | 0.0143        | 3.685              |
| 454.32             | 0.0070        | 586.01             | 0.0010        | 2.141             | 451.91              | 0.0224        | 589.25              | 0.0393        | 2.246              |
| 454.17             | 0.0013        | 563.03             | 0.4601        | 2.306             | 450.89              | 0.0040        | 539.15              | 0.2901        | 2.250              |
| 439.17             | 0.0020        | 539.79             | 0.0142        | 2.237             | 447.46              | 0.0021        | 526.10              | 0.2613        | 2.282              |
| 413.72             | 0.0156        | 529.08             | 0.6616        | 3.246             | 435.37              | 0.0002        | 515.92              | 0.0284        | 2.102              |

**Table S15** Excitation energies in the  $M_{612} \equiv \{\text{Lut620}, \text{Chl}a612\}$  subsystem drawn from M and M'', in protein interior-like environment.

| $\lambda_{M_{612}}^{M,S}$ | $f_{M_{612}}^{M,S}$ | $\lambda_{M_{612}}^{M,T}$ | $f_{M_{612}}^{M,T}$ | $\langle S^2 \rangle_{M_{612}}^{M,T}$ | $\lambda_{M_{612}}^{M'',S}$ | $f_{M_{612}}^{M'',S}$ | $\lambda_{M_{612}}^{M'',T}$ | $f_{M_{612}}^{M'',T}$ | $\langle S^2 \rangle_{M_{612}}^{M'',T}$ |
|---------------------------|---------------------|---------------------------|---------------------|---------------------------------------|-----------------------------|-----------------------|-----------------------------|-----------------------|-----------------------------------------|
| 634.52                    | 0.2958              | 2059.44                   | 0.0014              | 2.139                                 | 887.45                      | 2.8758                | 1566.06                     | 0.0000                | 4.209                                   |
| 522.83                    | 0.0216              | 1750.49                   | 0.0306              | 2.155                                 | 689.75                      | 0.2807                | 1016.81                     | 0.0001                | 4.202                                   |
| 430.75                    | 2.2302              | 1267.52                   | 0.0000              | 4.046                                 | 628.07                      | 0.2167                | 755.78                      | 0.0226                | 2.760                                   |
| 408.73                    | 0.6273              | 695.36                    | 0.0069              | 2.262                                 | 528.78                      | 0.0045                | 645.58                      | 0.0032                | 3.841                                   |
| 383.00                    | 1.5602              | 693.32                    | 0.0001              | 3.991                                 | 488.61                      | 0.0992                | 636.46                      | 0.2805                | 2.253                                   |
| 366.29                    | 0.7544              | 652.69                    | 0.0064              | 2.135                                 | 455.04                      | 0.1443                | 605.05                      | 0.0134                | 2.738                                   |
| 349.89                    | 0.9723              | 641.28                    | 0.0016              | 2.502                                 | 440.39                      | 0.0112                | 534.81                      | 0.0028                | 3.828                                   |
| 327.59                    | 0.0043              | 627.26                    | 0.1680              | 2.469                                 | 405.07                      | 0.0466                | 532.14                      | 0.0096                | 2.659                                   |
| 322.80                    | 0.0051              | 561.58                    | 0.0534              | 2.147                                 | 385.81                      | 0.4968                | 521.31                      | 0.0180                | 2.257                                   |
| 317.26                    | 0.0244              | 514.40                    | 0.0919              | 2.143                                 | 382.65                      | 0.4350                | 506.00                      | 0.0001                | 4.103                                   |
| 313.83                    | 0.0107              | 506.67                    | 0.0010              | 3.819                                 | 367.55                      | 0.6667                | 467.71                      | 2.6591                | 2.326                                   |
| 308.37                    | 0.0119              | 495.02                    | 0.0032              | 2.309                                 | 345.90                      | 0.9857                | 448.02                      | 0.1522                | 2.734                                   |
| 297.06                    | 0.1596              | 473.81                    | 0.2186              | 2.712                                 | 329.96                      | 0.0071                | 429.42                      | 0.0760                | 2.388                                   |
| 295.11                    | 0.2198              | 427.79                    | 1.5536              | 2.470                                 | 327.59                      | 0.0051                | 421.42                      | 0.4208                | 2.456                                   |
| 290.79                    | 0.0029              | 424.66                    | 0.0370              | 2.352                                 | 323.85                      | 0.1787                | 392.67                      | 0.0029                | 4.168                                   |
| 286.41                    | 0.0033              | 420.59                    | 1.7607              | 2.879                                 | 322.34                      | 0.0104                | 386.46                      | 0.2011                | 3.068                                   |
| 281.41                    | 0.1101              | 403.05                    | 0.0513              | 2.136                                 | 319.30                      | 0.0226                | 381.48                      | 0.9290                | 2.419                                   |
| 274.63                    | 0.1095              | 398.70                    | 0.1441              | 2.254                                 | 299.78                      | 0.0947                | 380.18                      | 0.0070                | 4.118                                   |
| 270.03                    | 0.0048              | 390.09                    | 0.4898              | 2.511                                 | 296.84                      | 0.0826                | 375.23                      | 0.0427                | 2.480                                   |
| 266.68                    | 0.0756              | 379.19                    | 0.0696              | 2.236                                 | 296.19                      | 0.7483                | 370.88                      | 0.0967                | 3.368                                   |



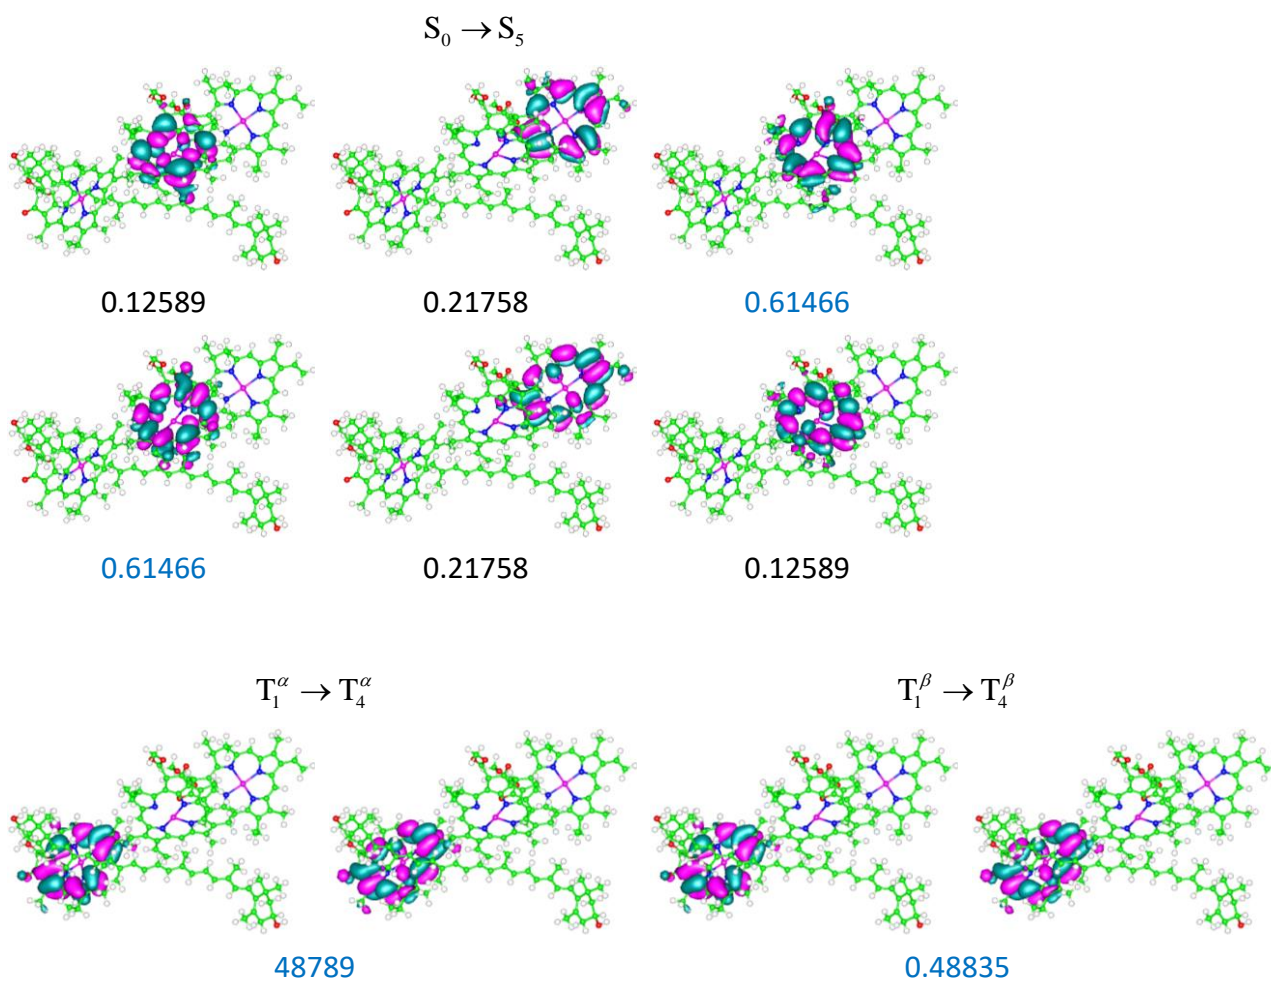

**Fig. S8** NTOs representative of the  $S_0 \rightarrow S_5$  and  $T_1 \rightarrow T_4$  transitions in M' in protein interior-like environment.

## S9. Properties of the singlet transitions

Ref. 6 reports on-site excitation energies of 14944, 14876 and 15141  $\text{cm}^{-1}$  for Chls *a*610, 611 and 612, respectively. These values were obtained using the QM/MMpol<sup>7</sup> method with the M06-2X functional and the 6-31+G(d) basis set. Moreover, the site energies were shifted by  $-1210 \text{ cm}^{-1}$ . Using the  $S_0 \rightarrow S_1$  excitation energy of Chl *a*611 as the zero of the energy scale, the corresponding excitations in Chl *a*610 and Chl *a*612 are 68 and 265  $\text{cm}^{-1}$ , respectively. These relative values of the excitation energies are consistent with the NTOs shown in Figs. 7-9. In fact, the electronic excitations  $S_0 \rightarrow S_3$ ,  $S_0 \rightarrow S_4$ , and  $S_0 \rightarrow S_5$  mainly occur on Chls *a*611, *a*610, and *a*612, respectively. We calculated the on-site

excitation energies of the three chlorophylls using their geometries in system M (or, equivalently, in M' and M'', as the chlorophylls were fixed in the geometry optimizations leading to these structures). We used the  $\omega$ B97X-D/6-31g\* and M06-2X/6-31+g\* computational setups in the continuum model of a protein interior. Both approaches confirm the site energy trend obtained in ref. 6 using a different theoretical method, which also supports the results found in this study by describing the environment as a PCM (see Table S16)

**Table S16** Site excitation energy of Chl *a*611 and relative excitation energies of Chl *a*610 and Chl *a*611 expressed in  $\text{cm}^{-1}$ .  $1210 \text{ cm}^{-1}$  was added back to the value for Chl *a*611 from ref. 6 to enable the comparison.

| Method                                         | $E$ (Chl <i>a</i> 611) | $\Delta E$ (Chl <i>a</i> 610) | $\Delta E$ (Chl <i>a</i> 612) |
|------------------------------------------------|------------------------|-------------------------------|-------------------------------|
| QM/MMpol, <sup>7</sup> M06-2X/6-31+g* (ref. 6) | 16086                  | 68                            | 265                           |
| TDDFT-SCRF, M06-2X/6-31+g*                     | 15986                  | 100                           | 210                           |
| TDDFT-SCRF, $\omega$ B97X-D/6-31g*             | 15534                  | 100                           | 186                           |
| TDDFT, $\omega$ B97X-D/6-31g*                  | 15891                  | 92                            | 178                           |

The relevant  $S_0 \rightarrow S_3$ ,  $S_0 \rightarrow S_4$ , and  $S_0 \rightarrow S_5$  excitations studied in different molecular systems are clearly identified with the excitations  $S_0 \rightarrow S_1(Q_y)$ , each mainly localized on one of the chlorophylls. This is shown in Table S17 (to be compared with the Tables 1 and 2 in ref. 8).

**Table S17** Properties of the indicated singlet electronic excitations, including their excitation energy  $E$ , the corresponding wavelength  $\lambda$ , the dipole oscillator strength  $f$ , the major MOs involved, and the absolute values of the corresponding coefficients in the linear combinations describing the electronic excitations. Only the MO excitations with contributions larger than 0.2 are reported. The largest MO contributions to the excitations are highlighted in blue. The approximate correspondence between the MOs in M'' and in the isolated chlorophylls is shown in parentheses.



| system           | excitation            | $E$ (eV) | $\lambda$ (nm) | $f$  | main MOs involved                                                                               | MO contributions |
|------------------|-----------------------|----------|----------------|------|-------------------------------------------------------------------------------------------------|------------------|
| Chl <i>a</i> 610 | $S_0 \rightarrow S_1$ | 1.94     | 639.63         | 0.30 | HOMO $\rightarrow$ LUMO                                                                         | 0.65             |
|                  |                       |          |                |      | HOMO $- 1 \rightarrow$ LUMO $+ 1$                                                               | 0.26             |
| Chl <i>a</i> 611 | $S_0 \rightarrow S_1$ | 1.93     | 643.76         | 0.31 | HOMO $\rightarrow$ LUMO                                                                         | 0.66             |
|                  |                       |          |                |      | HOMO $- 1 \rightarrow$ LUMO $+ 1$                                                               | 0.25             |
| Chl <i>a</i> 612 | $S_0 \rightarrow S_1$ | 1.95     | 635.16         | 0.30 | HOMO $\rightarrow$ LUMO                                                                         | 0.65             |
|                  |                       |          |                |      | HOMO $- 1 \rightarrow$ LUMO $+ 1$                                                               | 0.25             |
| M''              | $S_0 \rightarrow S_3$ | 1.91     | 650.03         | 0.64 | HOMO $- 2 \rightarrow$ LUMO $+ 2$<br>(HOMO <sub>a610</sub> $\rightarrow$ LUMO <sub>a610</sub> ) | 0.32             |
|                  |                       |          |                |      | HOMO $- 1 \rightarrow$ LUMO $+ 1$<br>(HOMO <sub>a611</sub> $\rightarrow$ LUMO <sub>a611</sub> ) | 0.41             |
|                  |                       |          |                |      | HOMO $- 1 \rightarrow$ LUMO $+ 3$<br>(HOMO <sub>a611</sub> $\rightarrow$ LUMO <sub>a612</sub> ) | 0.32             |
|                  |                       |          |                |      | $S_0 \rightarrow S_4$                                                                           | 1.92             |
|                  | $S_0 \rightarrow S_4$ | 1.92     | 646.26         | 0.10 | HOMO $- 1 \rightarrow$ LUMO $+ 1$<br>(HOMO <sub>a611</sub> $\rightarrow$ LUMO <sub>a611</sub> ) | 0.23             |
|                  |                       |          |                |      | $S_0 \rightarrow S_5$                                                                           | 1.97             |
|                  | $S_0 \rightarrow S_5$ | 1.97     | 628.11         | 0.09 | HOMO $- 3 \rightarrow$ LUMO $+ 3$<br>(HOMO <sub>a612</sub> $\rightarrow$ LUMO <sub>a612</sub> ) | 0.43             |
|                  |                       |          |                |      | HOMO $- 1 \rightarrow$ LUMO $+ 1$<br>(HOMO <sub>a611</sub> $\rightarrow$ LUMO <sub>a611</sub> ) | 0.24             |

The study in ref. 8 finds that the first  $Q_y$  transition mainly amounts to the HOMO  $\rightarrow$  LUMO transition. We consistently find that the  $S_0 \rightarrow S_1$  transition in each isolated chlorophyll mainly involves a HOMO  $\rightarrow$  LUMO transition. Furthermore, the excitation energies obtained in this study are very close to the quasi-experimental values used as reference values in ref. 8. Table S17 shows exciton coupling effects through the combinations of MOs localized on different chlorophylls that describe the transitions and the fact that the  $S_0 \rightarrow S_3$  and  $S_0 \rightarrow S_4$  excitations are lower in energy than the  $S_0 \rightarrow S_1$  excitations in the isolated chlorophylls, compatibly with the coupling values calculated in ref. 6.

## S10. Atomic coordinates of the M, M' and M'' systems

Nuclear coordinates of system M (the H atoms, including those used to saturate the pruned molecular system, were optimized as described in the paper, while the coordinates of the heavy atoms are as in the crystal structure from the PDB file 1RWT<sup>9</sup>):

|    |              |             |              |
|----|--------------|-------------|--------------|
| Mg | 2.16400000   | 27.50600100 | 116.34700000 |
| C  | 3.88400000   | 28.50099900 | 119.23000300 |
| C  | -0.74400000  | 28.72900000 | 117.72399900 |
| C  | 0.72000000   | 27.33099900 | 113.26100200 |
| C  | 5.19200000   | 26.48200000 | 115.03900100 |
| N  | 1.63100000   | 28.41099900 | 118.23100300 |
| C  | 2.50800000   | 28.84199900 | 119.21900200 |
| C  | 1.72300000   | 29.61500000 | 120.26899700 |
| C  | 0.31100000   | 29.15800100 | 120.04100000 |
| C  | 0.33200000   | 28.69899900 | 118.59500100 |
| C  | -0.08700000  | 27.97200000 | 120.94100200 |
| C  | 1.90700000   | 31.15500100 | 120.15899700 |
| N  | 0.35200000   | 28.05400100 | 115.60299700 |
| C  | -0.73300000  | 28.45200000 | 116.35399600 |
| C  | -1.88200000  | 28.57099900 | 115.48999800 |
| C  | -1.48200000  | 28.26700000 | 114.22200000 |
| C  | -0.07500000  | 27.85800000 | 114.30500000 |
| C  | -3.27600000  | 28.99300000 | 116.04599800 |
| C  | -2.51900000  | 28.44700100 | 113.20700100 |
| C  | -2.39300000  | 28.17100000 | 111.89600400 |
| N  | 2.83500000   | 26.93300100 | 114.48799900 |
| C  | 2.07000000   | 26.91099900 | 113.33899700 |
| C  | 2.87400000   | 26.38600000 | 112.24900100 |
| C  | 4.14300000   | 26.23100100 | 112.72300000 |
| C  | 4.11100000   | 26.54299900 | 114.13999900 |
| C  | 2.47600000   | 26.10600100 | 110.79200000 |
| C  | 5.40900000   | 25.78599900 | 111.92199700 |
| C  | 6.13900000   | 26.87000100 | 111.12799800 |
| N  | 4.02800000   | 27.19700100 | 117.06800100 |
| C  | 5.16800000   | 26.78700100 | 116.41400100 |
| C  | 6.30200000   | 26.77800000 | 117.33400000 |
| C  | 5.84800000   | 27.40500100 | 118.45900000 |
| C  | 4.47000000   | 27.71600000 | 118.25199900 |
| C  | 7.68900000   | 26.22200000 | 117.09100300 |
| C  | 6.20300000   | 27.92400000 | 119.75900300 |
| O  | 7.22400000   | 27.77000000 | 120.43599700 |
| C  | 4.99100000   | 28.78800000 | 120.26200100 |
| C  | 4.58900000   | 28.35500000 | 121.71900200 |
| O  | 3.92900000   | 27.33099900 | 121.91200300 |
| O  | 4.96100000   | 29.27800000 | 122.76599900 |
| C  | 4.97100000   | 28.96400100 | 124.13999900 |
| Mg | -15.55100000 | 25.63800000 | 113.53199800 |
| C  | -13.17900000 | 27.40300000 | 115.40499900 |

|    |              |             |              |
|----|--------------|-------------|--------------|
| C  | -18.07399900 | 27.34100000 | 115.19000200 |
| C  | -17.82799900 | 24.39900000 | 111.28800200 |
| C  | -12.97300000 | 24.53200000 | 111.47699700 |
| N  | -15.61700000 | 27.12800000 | 115.12000300 |
| C  | -14.52700000 | 27.71100000 | 115.74700200 |
| C  | -15.00800000 | 28.66200100 | 116.83300000 |
| C  | -16.46999900 | 28.37500000 | 116.94000200 |
| C  | -16.78900000 | 27.60800000 | 115.66799900 |
| C  | -16.72200000 | 27.51100000 | 118.18399800 |
| C  | -14.99200000 | 30.18800000 | 116.68900300 |
| N  | -17.59199900 | 25.78000100 | 113.32199900 |
| C  | -18.44400000 | 26.52300100 | 114.11499800 |
| C  | -19.80200000 | 26.33799900 | 113.64099900 |
| C  | -19.74300000 | 25.54400100 | 112.52600100 |
| C  | -18.34199900 | 25.17100000 | 112.34100300 |
| C  | -21.03300100 | 26.97600000 | 114.34600100 |
| C  | -21.01499900 | 25.28800000 | 111.85600300 |
| C  | -21.15600000 | 24.59700000 | 110.68000000 |
| N  | -15.41500000 | 24.53300100 | 111.76200100 |
| C  | -16.48500100 | 24.10000000 | 111.00900300 |
| C  | -16.00200100 | 23.35600100 | 109.86200000 |
| C  | -14.64400000 | 23.40200000 | 109.89800300 |
| C  | -14.27400000 | 24.19800000 | 111.06300400 |
| C  | -16.85600100 | 22.73000000 | 108.74800100 |
| C  | -13.67000000 | 22.67200100 | 108.92800100 |
| C  | -13.38300000 | 23.45700100 | 107.66600000 |
| N  | -13.52700000 | 25.69500000 | 113.55899800 |
| C  | -12.60700000 | 25.23500100 | 112.63800000 |
| C  | -11.25900000 | 25.65700000 | 113.00399800 |
| C  | -11.42000000 | 26.45000100 | 114.10500300 |
| C  | -12.82100000 | 26.52199900 | 114.38500200 |
| C  | -9.95200000  | 25.31699900 | 112.26899700 |
| C  | -10.75700000 | 27.27599900 | 115.08599900 |
| O  | -9.56800000  | 27.53800000 | 115.25299800 |
| C  | -11.85900000 | 27.93300100 | 115.98100300 |
| C  | -11.64900000 | 27.52800000 | 117.47100100 |
| O  | -11.84800000 | 26.38900000 | 117.89700300 |
| O  | -11.16400000 | 28.60199900 | 118.27400200 |
| C  | -11.08500000 | 28.54700100 | 119.65699800 |
| Mg | -7.36600000  | 29.12500000 | 109.63200400 |
| C  | -8.49400000  | 30.59600100 | 112.63099700 |
| C  | -4.49600000  | 31.07099900 | 109.86699700 |
| C  | -6.61400000  | 28.43199900 | 106.36000100 |
| C  | -10.60900000 | 27.99799900 | 109.08100100 |
| N  | -6.53500000  | 30.52400000 | 111.13700100 |
| C  | -7.15000000  | 30.93700000 | 112.31199600 |
| C  | -6.22800000  | 31.86300100 | 113.09300200 |
| C  | -5.09600000  | 32.14500000 | 112.14199800 |
| C  | -5.33700000  | 31.19300100 | 110.97399900 |
| C  | -5.11500000  | 33.63100100 | 111.73600000 |
| C  | -5.73000000  | 31.38800000 | 114.45099600 |
| N  | -5.71300000  | 29.44400000 | 108.43299900 |

|   |              |             |              |
|---|--------------|-------------|--------------|
| C | -4.65700000  | 30.29100000 | 108.71700300 |
| C | -3.76900000  | 30.33200100 | 107.57399700 |
| C | -4.36500000  | 29.62599900 | 106.56400300 |
| C | -5.61700000  | 29.08600000 | 107.10199700 |
| C | -2.41200000  | 31.09100000 | 107.60500300 |
| C | -3.65000000  | 29.61400000 | 105.28399700 |
| C | -4.01200000  | 28.87200000 | 104.17800100 |
| N | -8.40000000  | 28.24099900 | 108.05300100 |
| C | -7.89200000  | 28.03599900 | 106.78700300 |
| C | -8.89600000  | 27.38800000 | 105.96600300 |
| C | -10.03100000 | 27.31100100 | 106.70900000 |
| C | -9.71700000  | 27.83400000 | 108.02300300 |
| C | -8.76600000  | 26.98399900 | 104.48200200 |
| C | -11.41400000 | 26.81200000 | 106.24900100 |
| C | -12.26300000 | 27.95800000 | 105.68199900 |
| N | -9.10500000  | 29.09700000 | 110.65899700 |
| C | -10.34500000 | 28.60000000 | 110.31300400 |
| C | -11.33600000 | 28.98800100 | 111.29599800 |
| C | -10.66400000 | 29.71200000 | 112.23200200 |
| C | -9.30900000  | 29.81399900 | 111.80699900 |
| C | -12.82000000 | 28.66300000 | 111.24299600 |
| C | -10.76100000 | 30.40399900 | 113.49299600 |
| O | -11.70600000 | 30.57000000 | 114.25099900 |
| C | -9.36700000  | 30.97300000 | 113.84100300 |
| C | -9.47200000  | 32.51699800 | 114.06099700 |
| O | -9.22300000  | 32.95500200 | 115.18599700 |
| O | -9.93600000  | 33.31700100 | 112.97399900 |
| C | -9.39000000  | 34.53699900 | 112.68199900 |
| C | -9.24600000  | 23.00900100 | 98.13099700  |
| C | -9.33900000  | 22.41200100 | 96.70900000  |
| C | -9.41900000  | 20.89399900 | 96.55000300  |
| C | -8.71900000  | 20.11300100 | 97.66100300  |
| C | -8.70800000  | 20.67900100 | 99.04200000  |
| C | -8.94500000  | 22.01400000 | 99.29599800  |
| C | -8.93100000  | 22.54400100 | 100.67400400 |
| C | -7.85700000  | 22.83499900 | 101.43499800 |
| C | -7.87700000  | 23.22699900 | 102.84600100 |
| C | -6.70900000  | 23.59000000 | 103.42199700 |
| C | -6.51900000  | 24.02000000 | 104.78500400 |
| C | -5.34500000  | 24.54200000 | 105.16999800 |
| C | -4.93200000  | 25.08300000 | 106.47300000 |
| C | -3.71000000  | 25.65600000 | 106.53700300 |
| C | -3.08700000  | 26.32900000 | 107.64199800 |
| C | -10.55700000 | 23.77199900 | 98.39700300  |
| C | -8.11400000  | 24.04700100 | 98.01599900  |
| C | -8.42200000  | 19.56100100 | 99.98200200  |
| C | -9.21000000  | 23.25000000 | 103.54299900 |
| C | -5.90900000  | 25.03500000 | 107.61000100 |
| O | -8.91200000  | 20.50099900 | 95.28299700  |
| C | 3.82000000   | 34.42699800 | 114.84999800 |
| C | 4.18400000   | 35.19200100 | 116.13999900 |
| C | 5.29800000   | 34.56499900 | 116.98200200 |

|   |              |             |              |
|---|--------------|-------------|--------------|
| C | 5.29800000   | 33.03200100 | 116.95800000 |
| C | 4.59300000   | 32.29600100 | 116.07199900 |
| C | 3.69600000   | 32.87300100 | 114.98300200 |
| C | 3.86100000   | 32.09199900 | 113.67700200 |
| C | 2.87100000   | 31.40099900 | 113.05200200 |
| C | 2.87300000   | 30.85400000 | 111.68100000 |
| C | 1.77600000   | 30.18700000 | 111.26100200 |
| C | 1.56100000   | 29.57799900 | 109.97300000 |
| C | 0.41600000   | 28.91600000 | 109.71299700 |
| C | -0.01200000  | 28.20800000 | 108.49700200 |
| C | -1.22400000  | 27.61300100 | 108.51899700 |
| C | -1.87200000  | 26.87500000 | 107.47300000 |
| C | 4.89000000   | 34.79999900 | 113.78600300 |
| C | 2.47700000   | 34.99800100 | 114.37400100 |
| C | 4.74300000   | 30.82900000 | 116.26300000 |
| C | 4.09800000   | 31.06399900 | 110.83999600 |
| C | 0.92800000   | 28.19100000 | 107.32000000 |
| O | 5.22500000   | 35.04200000 | 118.31900000 |
| H | 4.64972602   | 29.86308490 | 124.67055025 |
| H | 5.98772611   | 28.69793961 | 124.44289435 |
| H | 4.29149454   | 28.13441058 | 124.36128504 |
| H | 5.31126079   | 29.83594613 | 120.28529330 |
| H | 7.66326531   | 25.12751183 | 117.08290606 |
| H | 8.36042016   | 26.54598678 | 117.88866634 |
| H | 8.09086994   | 26.55298633 | 116.12789943 |
| H | 6.15326504   | 26.18337139 | 114.62867566 |
| H | 5.47915868   | 27.32366580 | 110.38091116 |
| H | 7.00111066   | 26.43990334 | 110.61046880 |
| H | 6.49388974   | 27.66832765 | 111.78959200 |
| H | 6.10951955   | 25.31255427 | 112.61814039 |
| H | 5.09468752   | 24.99310751 | 111.23204533 |
| H | 2.80873167   | 25.10468228 | 110.50382971 |
| H | 2.93741828   | 26.83288146 | 110.11504131 |
| H | 1.39359091   | 26.16090489 | 110.64524214 |
| H | 0.25736152   | 27.24522790 | 112.28441076 |
| H | -3.43120219  | 28.92082619 | 113.55289405 |
| H | -3.18989701  | 28.39729664 | 111.19189078 |
| H | -1.52129364  | 27.66271553 | 111.50592264 |
| H | -4.08745920  | 28.55423494 | 115.46310586 |
| H | -3.39060222  | 30.08270654 | 116.04793818 |
| H | -3.38843792  | 28.63287471 | 117.06979225 |
| H | -1.69132382  | 29.03200490 | 118.15675280 |
| H | -0.40900067  | 29.97363456 | 120.17901385 |
| H | -1.07530876  | 27.59137606 | 120.66932634 |
| H | -0.10460041  | 28.27627523 | 121.99161266 |
| H | 0.64077461   | 27.15993883 | 120.83480475 |
| H | 2.06877628   | 29.31710252 | 121.26787690 |
| H | 2.95847424   | 31.42670299 | 120.29366430 |
| H | 1.31765558   | 31.65058404 | 120.93527129 |
| H | 1.57870373   | 31.51315416 | 119.17611310 |
| H | -11.86692715 | 29.17847063 | 120.09266714 |
| H | -10.10628506 | 28.93098875 | 119.95575693 |

|   |              |             |              |
|---|--------------|-------------|--------------|
| H | -11.20036486 | 27.52083755 | 120.02226082 |
| H | -11.74902493 | 29.01847054 | 115.90143444 |
| H | -9.10591628  | 25.51853237 | 112.92968439 |
| H | -9.85208326  | 25.94318343 | 111.37395507 |
| H | -9.93447335  | 24.26713514 | 111.96471297 |
| H | -12.15965802 | 24.22184586 | 110.82368814 |
| H | -12.73926758 | 22.45470679 | 109.46225355 |
| H | -14.11476071 | 21.70266669 | 108.67940253 |
| H | -14.31072825 | 23.73947051 | 107.15662123 |
| H | -12.77205362 | 22.87873916 | 106.96686409 |
| H | -12.84258199 | 24.37793782 | 107.90102669 |
| H | -16.26490048 | 22.01483274 | 108.17036538 |
| H | -17.22318646 | 23.50164205 | 108.06215908 |
| H | -17.72213496 | 22.20043101 | 109.15701835 |
| H | -18.54626536 | 23.97992256 | 110.59733915 |
| H | -21.90125180 | 25.68467849 | 112.33784586 |
| H | -22.14101141 | 24.45250298 | 110.24790979 |
| H | -20.32305230 | 24.19585868 | 110.12035078 |
| H | -21.88302774 | 26.29002944 | 114.34413446 |
| H | -21.33829892 | 27.90352106 | 113.85055351 |
| H | -20.79616850 | 27.20178595 | 115.38613365 |
| H | -18.87812200 | 27.82691473 | 115.73312267 |
| H | -17.08309414 | 29.27776161 | 117.00868229 |
| H | -17.77471888 | 27.22335092 | 118.28205438 |
| H | -16.43227429 | 28.06733695 | 119.08193425 |
| H | -16.11973199 | 26.59797541 | 118.13552937 |
| H | -14.47933769 | 28.40571287 | 117.76171166 |
| H | -13.98797323 | 30.60349854 | 116.55215505 |
| H | -15.42046884 | 30.62065889 | 117.59573839 |
| H | -15.59475243 | 30.49933577 | 115.82981317 |
| H | -10.14442923 | 35.11480789 | 112.14363064 |
| H | -8.50566029  | 34.42786194 | 112.03985245 |
| H | -9.10851171  | 35.08598431 | 113.58887176 |
| H | -9.03127894  | 30.56076689 | 114.79478809 |
| H | -13.29956305 | 29.17344231 | 110.40192018 |
| H | -13.29936153 | 28.98724647 | 112.17074721 |
| H | -12.97928509 | 27.58548548 | 111.12593674 |
| H | -11.63233360 | 27.66624212 | 108.91632327 |
| H | -11.28893039 | 26.02231687 | 105.50112256 |
| H | -11.93285892 | 26.35400167 | 107.09808796 |
| H | -13.26454244 | 27.60875965 | 105.41381150 |
| H | -11.79232187 | 28.37735300 | 104.78822942 |
| H | -12.36012664 | 28.76372017 | 106.41705832 |
| H | -9.71839191  | 26.60249822 | 104.10841903 |
| H | -8.00044599  | 26.21295810 | 104.34139882 |
| H | -8.48621678  | 27.84823993 | 103.87019418 |
| H | -6.39807059  | 28.25628716 | 105.31348266 |
| H | -2.81085438  | 30.29516601 | 105.20281627 |
| H | -3.44789318  | 28.95217790 | 103.25448024 |
| H | -4.81981675  | 28.15133433 | 104.19970470 |
| H | -2.54135625  | 32.14892971 | 107.35365881 |
| H | -1.69936370  | 30.64675841 | 106.90768116 |

|   |              |             |              |
|---|--------------|-------------|--------------|
| H | -1.97123762  | 31.01650424 | 108.60216818 |
| H | -3.60322518  | 31.68915042 | 109.89708361 |
| H | -4.12536807  | 31.91244185 | 112.59970929 |
| H | -4.30350305  | 33.87854108 | 111.04416896 |
| H | -5.02130240  | 34.26372968 | 112.62371118 |
| H | -6.06367975  | 33.86394244 | 111.23882648 |
| H | -6.78874332  | 32.79254847 | 113.28171077 |
| H | -6.55084586  | 31.23959903 | 115.15879637 |
| H | -5.18394025  | 30.44317478 | 114.35425506 |
| H | -5.05108401  | 32.13870250 | 114.87022795 |
| H | -9.47414240  | 20.90724917 | 94.60867603  |
| H | -10.48331718 | 20.60685621 | 96.60776971  |
| H | 4.42224781   | 34.66183989 | 118.70533973 |
| H | 6.27719325   | 34.91595966 | 116.62992184 |
| H | -9.25214415  | 18.84497274 | 99.97228814  |
| H | -8.26628989  | 19.89141348 | 101.01282540 |
| H | -7.52815830  | 19.01602736 | 99.65756895  |
| H | 5.15088026   | 30.32985125 | 115.37407489 |
| H | 3.76971311   | 30.34499437 | 116.44906662 |
| H | 5.39123704   | 30.60032358 | 117.11101662 |
| H | -9.13803190  | 19.09976648 | 97.67862888  |
| H | 5.91197429   | 32.56071903 | 117.72095492 |
| H | -7.15745573  | 23.55043166 | 97.81984855  |
| H | -8.00984887  | 24.63687238 | 98.93451760  |
| H | -8.32405936  | 24.73459851 | 97.18899456  |
| H | -10.53913016 | 24.27945591 | 99.36750352  |
| H | -11.41530225 | 23.09068011 | 98.38547199  |
| H | -10.71042216 | 24.53221108 | 97.62431828  |
| H | 4.61696043   | 34.42162030 | 112.79609774 |
| H | 5.87329253   | 34.39111654 | 114.05075055 |
| H | 4.98006465   | 35.88853414 | 113.71682790 |
| H | 1.69600058   | 34.83839621 | 115.12748800 |
| H | 2.15336463   | 34.51955971 | 113.44298950 |
| H | 2.55876029   | 36.07551967 | 114.19256490 |
| H | 4.41841796   | 36.23246307 | 115.89822008 |
| H | 3.29551935   | 35.21384194 | 116.78857089 |
| H | -10.17135516 | 22.87922517 | 96.16901492  |
| H | -8.42819726  | 22.68643063 | 96.16289565  |
| H | 2.66593848   | 32.66207116 | 115.32070897 |
| H | 4.83512298   | 32.17780000 | 113.19433591 |
| H | 1.91419137   | 31.31910164 | 113.57237142 |
| H | 3.99695154   | 30.65304333 | 109.83611669 |
| H | 4.96876279   | 30.59171042 | 111.31265721 |
| H | 4.32336654   | 32.13308397 | 110.75032522 |
| H | 0.95078237   | 30.08110950 | 111.96706152 |
| H | 2.34183277   | 29.63700511 | 109.21676629 |
| H | -0.32813194  | 28.92354067 | 110.50886499 |
| H | 0.54168742   | 27.61286816 | 106.48029918 |
| H | 1.89400570   | 27.76435094 | 107.61027056 |
| H | 1.12065146   | 29.21234828 | 106.97246228 |
| H | -1.81233986  | 27.71767758 | 109.42715492 |
| H | -1.38100728  | 26.76905240 | 106.50811951 |

|   |             |             |              |
|---|-------------|-------------|--------------|
| H | -3.60341301 | 26.43193754 | 108.59407140 |
| H | -3.10873634 | 25.63131677 | 105.62781622 |
| H | -5.50170057 | 25.46539080 | 108.52647645 |
| H | -6.20379988 | 24.00108904 | 107.82130756 |
| H | -6.82174795 | 25.59012104 | 107.35402970 |
| H | -4.56317757 | 24.59048594 | 104.40877664 |
| H | -7.34527927 | 23.95708717 | 105.49077714 |
| H | -5.81207623 | 23.57799209 | 102.80305236 |
| H | -9.88049659 | 23.96688368 | 103.05077988 |
| H | -9.13204920 | 23.53386200 | 104.59274373 |
| H | -9.69157177 | 22.26739124 | 103.48587297 |
| H | -6.86810228 | 22.71097097 | 100.98968549 |
| H | -9.91856350 | 22.70253558 | 101.11502071 |
| H | -7.67116114 | 19.97613086 | 97.34400798  |

Nuclear coordinates of the carotenoid in system M':

|   |                |               |                |
|---|----------------|---------------|----------------|
| C | -9.9741533045  | 22.1948953205 | 98.2563441250  |
| C | -9.6020797256  | 21.7458739692 | 96.8321993647  |
| C | -9.1408923775  | 20.2991620288 | 96.7702604526  |
| C | -7.8956669479  | 20.1317798990 | 97.6196355492  |
| C | -7.9859289675  | 20.7915447960 | 98.9787667681  |
| C | -8.8981645423  | 21.7476990808 | 99.2639993956  |
| C | -8.9714311009  | 22.4277676315 | 100.5682099260 |
| C | -7.9235010100  | 22.9735400710 | 101.2372332400 |
| C | -7.9989686806  | 23.6664296874 | 102.4964362925 |
| C | -6.8198937968  | 24.1872676114 | 103.0275583801 |
| C | -6.6546484471  | 24.8900930691 | 104.2227984817 |
| C | -5.3869814432  | 25.3576073694 | 104.6491060030 |
| C | -5.0857396361  | 26.0448166581 | 105.8026379581 |
| C | -3.7026477337  | 26.4251384068 | 106.0304856639 |
| C | -3.2284686707  | 27.0998180217 | 107.1023766837 |
| C | -11.3411635752 | 21.6054415505 | 98.6577222336  |
| C | -10.0884904279 | 23.7295742347 | 98.2437515368  |
| C | -6.9583445809  | 20.2740632250 | 99.9535544525  |
| C | -9.3352433381  | 23.7994924676 | 103.1737397894 |
| C | -6.1071977653  | 26.4210251838 | 106.8405273862 |
| O | -8.8062743977  | 19.9008005750 | 95.4467777956  |
| C | 4.0230432861   | 34.2678717327 | 115.0417203030 |
| C | 4.1393764376   | 34.8613788258 | 116.4550036760 |
| C | 5.3377270679   | 34.3202325839 | 117.2285646315 |
| C | 5.4073132618   | 32.8215062085 | 117.1202608676 |
| C | 4.7356905700   | 32.0933298420 | 116.2227259388 |
| C | 3.8176362345   | 32.7262250369 | 115.1788361075 |
| C | 3.9352333799   | 32.0175809716 | 113.8548469518 |
| C | 2.8908538437   | 31.4813669310 | 113.1898097291 |
| C | 2.9525553126   | 30.8062192334 | 111.9116246689 |
| C | 1.7730416389   | 30.3068900567 | 111.3780044752 |
| C | 1.5992838932   | 29.6225419623 | 110.1661450794 |
| C | 0.3335325574   | 29.1684568443 | 109.7377344421 |
| C | 0.0272133282   | 28.4920181781 | 108.5738966913 |



|   |                |               |                |
|---|----------------|---------------|----------------|
| C | -1.3539169551  | 28.1174785245 | 108.3453908758 |
| C | -1.8300277720  | 27.4466230177 | 107.2701926924 |
| C | 5.2825748694   | 34.5979429149 | 114.2238261533 |
| C | 2.8061210702   | 34.8859070789 | 114.3453749155 |
| C | 4.8028900804   | 30.5893393679 | 116.2237487874 |
| C | 4.2880327696   | 30.6809577873 | 111.2322167326 |
| C | 1.0486109132   | 28.1229313738 | 107.5334085436 |
| O | 5.3117183634   | 34.7337347240 | 118.5929879481 |
| H | -9.6077889512  | 19.9840646989 | 94.9128760641  |
| H | -9.9313294085  | 19.6418962266 | 97.1632101817  |
| H | 4.5294475196   | 34.3250239256 | 118.9901886140 |
| H | 6.2622962748   | 34.7635877407 | 116.8382003774 |
| H | -6.8960359023  | 19.1808636932 | 99.8866087080  |
| H | -7.1774073733  | 20.5417544209 | 100.9890738376 |
| H | -5.9578370093  | 20.6586369280 | 99.7124221666  |
| H | 5.2715666344   | 30.2045359860 | 115.3098955018 |
| H | 3.7942707545   | 30.1572408243 | 116.2611419920 |
| H | 5.3700650320   | 30.2156891503 | 117.0819301222 |
| H | -7.6700635225  | 19.0652926798 | 97.7402750708  |
| H | 6.0423175219   | 32.3261238897 | 117.8547469547 |
| H | -9.1174696524  | 24.1953603800 | 98.0396397469  |
| H | -10.4557427433 | 24.1215962076 | 99.1982400448  |
| H | -10.7890052067 | 24.0466722024 | 97.4613967778  |
| H | -11.6470260947 | 21.9432177960 | 99.6541700163  |
| H | -11.3250076097 | 20.5107015581 | 98.6701232930  |
| H | -12.1152078619 | 21.9287398515 | 97.9507059458  |
| H | 5.1421376842   | 34.3499621674 | 113.1660377017 |
| H | 6.1629825316   | 34.0514446095 | 114.5799387779 |
| H | 5.5024620643   | 35.6704884126 | 114.2854353246 |
| H | 1.8907893396   | 34.7234517551 | 114.9279261037 |
| H | 2.6551830418   | 34.4525479763 | 113.3503374073 |
| H | 2.9410393307   | 35.9675439268 | 114.2246104081 |
| H | 4.1986705372   | 35.9552894078 | 116.4020282470 |
| H | 3.2276173706   | 34.6134599117 | 117.0189748770 |
| H | -10.4662071814 | 21.8983392097 | 96.1705297694  |
| H | -8.7867102113  | 22.3739983266 | 96.4483391250  |
| H | 2.7872312306   | 32.5730683900 | 115.5380098824 |
| H | 4.9366975893   | 31.9522278443 | 113.4322822765 |
| H | 1.9018234568   | 31.5564229655 | 113.6451658598 |
| H | 4.2273399897   | 30.1807149787 | 110.2641292280 |
| H | 4.9904085448   | 30.1148249682 | 111.8571359790 |
| H | 4.7334792623   | 31.6702254833 | 111.0684857429 |
| H | 0.8711369905   | 30.4658128433 | 111.9716581833 |
| H | 2.4648188293   | 29.4342030376 | 109.5378535475 |
| H | -0.5000620953  | 29.3790934086 | 110.4099922584 |
| H | 1.0902398462   | 27.0348582676 | 107.3982106503 |
| H | 2.0535358695   | 28.4652699655 | 107.7860416717 |
| H | 0.7844728692   | 28.5557434838 | 106.5605244377 |
| H | -2.0638361684  | 28.4085467604 | 109.1209933714 |
| H | -1.1528746076  | 27.1370337200 | 106.4749801877 |
| H | -3.9060343428  | 27.4110188572 | 107.8966541713 |
| H | -2.9923954305  | 26.1313146847 | 105.2562532997 |

|   |                |               |                |
|---|----------------|---------------|----------------|
| H | -6.0616181676  | 25.4454160615 | 107.4189521977 |
| H | -7.1081608163  | 26.3058434417 | 106.5024258208 |
| H | -5.8652870480  | 27.0575130656 | 107.6677812880 |
| H | -4.5529243991  | 25.1420199051 | 103.9790720676 |
| H | -7.5214684735  | 25.0853773882 | 104.8472595939 |
| H | -5.9161632332  | 24.0223498507 | 102.4383634266 |
| H | -10.0355205327 | 24.3644421459 | 102.5451424884 |
| H | -9.2731288551  | 24.3069321359 | 104.1379636366 |
| H | -9.7842087373  | 22.8136011871 | 103.3455770404 |
| H | -6.9333882944  | 22.9071010696 | 100.7873391574 |
| H | -9.9709630285  | 22.5587290454 | 100.9812297619 |
| H | -7.0447384691  | 20.5606205439 | 97.0684656115  |

Nuclear coordinates of the carotenoid in system M'':

|   |                |               |                |
|---|----------------|---------------|----------------|
| C | -13.3106734418 | 23.5212890715 | 103.0588185855 |
| C | -13.8689837861 | 23.7379697063 | 101.6418270543 |
| C | -13.6738851378 | 22.5327098474 | 100.7372272631 |
| C | -12.1920639986 | 22.2439934389 | 100.5932850901 |
| C | -11.4152236758 | 22.3086459114 | 101.8903915418 |
| C | -11.8851957600 | 22.9369628391 | 102.9945450323 |
| C | -11.1194195266 | 23.0767761883 | 104.2368201875 |
| C | -9.7875054592  | 23.3465480544 | 104.3562576562 |
| C | -9.0843570739  | 23.5597804603 | 105.5829476624 |
| C | -7.7393689514  | 23.9497891722 | 105.5201900019 |
| C | -6.9889970147  | 24.4554781418 | 106.5693535178 |
| C | -5.6584855753  | 24.9392878990 | 106.4351445775 |
| C | -4.9487890918  | 25.6160404492 | 107.3909665602 |
| C | -3.5976532447  | 26.0788591150 | 107.0995327281 |
| C | -2.9173126239  | 26.9321652219 | 107.8924271569 |
| C | -14.2218582085 | 22.5595924542 | 103.8494311011 |
| C | -13.3198810190 | 24.8877960475 | 103.7683830327 |
| C | -10.0760477852 | 21.6184642149 | 101.8114432631 |
| C | -9.8125667086  | 23.4421387151 | 106.8945011150 |
| C | -5.5033871868  | 25.9269122730 | 108.7554711596 |
| O | -14.1872199199 | 22.7558587478 | 99.4308193963  |
| C | 3.3380472436   | 33.3303168291 | 116.2095909963 |
| C | 3.3973519765   | 33.7972172008 | 117.6733588131 |
| C | 4.7980827061   | 33.7358598983 | 118.2726090946 |
| C | 5.4708096851   | 32.4336968943 | 117.9403214364 |
| C | 5.0646774101   | 31.5916316811 | 116.9848549344 |
| C | 3.8114766183   | 31.8420082907 | 116.1504212683 |
| C | 3.9980900600   | 31.3614999962 | 114.7321977473 |
| C | 3.0423816018   | 30.7697024744 | 113.9894868768 |
| C | 3.1888030893   | 30.3456502933 | 112.6100901570 |
| C | 2.0451151604   | 30.0265852285 | 111.9047041713 |
| C | 1.9308619869   | 29.5632102732 | 110.5822687066 |
| C | 0.6737872673   | 29.2254956482 | 110.0501183920 |
| C | 0.3707327568   | 28.5834351088 | 108.8619125086 |
| C | -1.0047664183  | 28.1952842989 | 108.6733732028 |
| C | -1.5404801810  | 27.3599471164 | 107.7493548725 |

|   |                |               |                |
|---|----------------|---------------|----------------|
| C | 4.2270459316   | 34.2226369522 | 115.3286036412 |
| C | 1.8876086615   | 33.4381983609 | 115.7259724227 |
| C | 5.8304289297   | 30.3330366005 | 116.6782290513 |
| C | 4.5700555448   | 30.2819467462 | 112.0208786214 |
| C | 1.3968407220   | 28.1686191143 | 107.8460890619 |
| O | 4.7802362166   | 33.9771999630 | 119.6771267914 |
| H | -15.1392605186 | 22.8927388781 | 99.5129447740  |
| H | -14.1668385260 | 21.6541088818 | 101.1795951517 |
| H | 4.2950406489   | 33.2471026927 | 120.0831667707 |
| H | 5.4031925666   | 34.5619022173 | 117.8780059322 |
| H | -10.1599573780 | 20.7060271576 | 101.2101163568 |
| H | -9.6848018451  | 21.3463683572 | 102.7940485529 |
| H | -9.3265675711  | 22.2510093666 | 101.3166420946 |
| H | 6.4150608296   | 30.4409760479 | 115.7564760117 |
| H | 5.1522505022   | 29.4895842055 | 116.5174330217 |
| H | 6.5240116822   | 30.0788866711 | 117.4843725562 |
| H | -12.0520343263 | 21.2637031543 | 100.1224746862 |
| H | 6.3677413037   | 32.2064440931 | 118.5162598112 |
| H | -12.5867045393 | 25.5707660770 | 103.3243274277 |
| H | -13.0962851206 | 24.7975109581 | 104.8360518601 |
| H | -14.3113852586 | 25.3474237408 | 103.6788087317 |
| H | -13.8503324354 | 22.4087652585 | 104.8683857465 |
| H | -14.2855551164 | 21.5761462965 | 103.3742136295 |
| H | -15.2349621687 | 22.9728901000 | 103.9265060627 |
| H | 4.0783553628   | 33.9938585021 | 114.2681045075 |
| H | 5.2907999991   | 34.0891373804 | 115.5535005514 |
| H | 3.9758737976   | 35.2784313811 | 115.4827445351 |
| H | 1.2191373637   | 32.8232022154 | 116.3415291850 |
| H | 1.7889626487   | 33.1109540717 | 114.6861576030 |
| H | 1.5430430829   | 34.4770324512 | 115.7869846411 |
| H | 3.0066108939   | 34.8183346825 | 117.7593475483 |
| H | 2.7408358123   | 33.1534275743 | 118.2741448422 |
| H | -14.9360040303 | 23.9919398470 | 101.7117883641 |
| H | -13.3646490735 | 24.5943195136 | 101.1741305822 |
| H | 3.0089497371   | 31.2338661417 | 116.6018644683 |
| H | 4.9671845981   | 31.5662424651 | 114.2803912977 |
| H | 2.0608162237   | 30.6061638329 | 114.4391155594 |
| H | 4.5852021964   | 29.8057751023 | 111.0389855969 |
| H | 5.2359838759   | 29.7122623216 | 112.6793571738 |
| H | 5.0018143756   | 31.2850874978 | 111.9110625308 |
| H | 1.1059204925   | 30.1156198633 | 112.4517881004 |
| H | 2.8260275971   | 29.4085190770 | 109.9862603281 |
| H | -0.1739569952  | 29.4407304179 | 110.7026993868 |
| H | 1.5189317472   | 27.0777110617 | 107.8419511176 |
| H | 2.3759880688   | 28.6147263645 | 108.0328433871 |
| H | 1.0816948074   | 28.4597962902 | 106.8373742312 |
| H | -1.6930936170  | 28.5789641479 | 109.4239582242 |
| H | -0.9403717770  | 26.9382635329 | 106.9447182849 |
| H | -3.4216669261  | 27.3370542217 | 108.7679199946 |
| H | -3.1299484533  | 25.7032334791 | 106.1893661067 |
| H | -4.8451659821  | 25.5352136155 | 109.5398262188 |
| H | -6.5025234320  | 25.5221922245 | 108.9157240135 |

|   |                |               |                |
|---|----------------|---------------|----------------|
| H | -5.5596184867  | 27.0126932842 | 108.8914232126 |
| H | -5.1786933644  | 24.7872129279 | 105.4670462647 |
| H | -7.4709345855  | 24.5565788982 | 107.5355055193 |
| H | -7.2679963525  | 23.9253185111 | 104.5361908374 |
| H | -10.4679388436 | 24.3048822737 | 107.0663049937 |
| H | -9.1273859970  | 23.3696623744 | 107.7411629837 |
| H | -10.4411617970 | 22.5457293628 | 106.9110146502 |
| H | -9.2031694326  | 23.4791806971 | 103.4478040794 |
| H | -11.7047062912 | 23.0404970036 | 105.1527544497 |
| H | -11.7710805690 | 22.9781867402 | 99.8891680893  |

1. J. Ho, E. Kish, D. D. Méndez-Hernández, K. WongCarter, S. Pillai, G. Kodis, J. Niklas, O. G. Poluektov, D. Gust, T. A. Moore, A. L. Moore, V. S. Batista and B. Robert, Triplet-triplet energy transfer in artificial and natural photosynthetic antennas, *Proc. Natl. Acad. Sci. U.S.A.*, 2017, **114**, E5513-E5521.
2. J. D. Chai and M. Head-Gordon, Long-range corrected hybrid density functionals with damped atom-atom dispersion corrections, *Phys. Chem. Chem. Phys.*, 2008, **10**, 6615-6620.
3. M. J. Frisch, G. W. Trucks, H. B. Schlegel, G. E. Scuseria, M. A. Robb, J. R. Cheeseman, G. Scalmani, V. Barone, G. A. Petersson, H. Nakatsuji, X. Li, M. Caricato, A. V. Marenich, J. Bloino, B. G. Janesko, R. Gomperts, B. Mennucci, H. P. Hratchian, J. V. Ortiz, A. F. Izmaylov, J. L. Sonnenberg, D. Williams-Young, F. Ding, F. Lipparini, F. Egidi, J. Goings, B. Peng, A. Petrone, T. Henderson, D. Ranasinghe, V. G. Zakrzewski, J. Gao, N. Rega, G. Zheng, W. Liang, M. Hada, M. Ehara, K. Toyota, R. Fukuda, J. Hasegawa, M. Ishida, T. Nakajima, Y. Honda, O. Kitao, H. Nakai, T. Vreven, K. Throssell, J. A. Montgomery, J. E. Peralta, Jr. , F. Ogliaro, M. J. Bearpark, J. J. Heyd, E. N. Brothers, K. N. Kudin, V. N. Staroverov, T. A. Keith, R. Kobayashi, J. Normand, K. Raghavachari, A. P. Rendell, J. C. Burant, S. S. Iyengar, J. Tomasi, M. Cossi, J. M. Millam, M. Klene, C. Adamo, R. Cammi, J. W. Ochterski, R. L. Martin, K. Morokuma, O. Farkas, J. B. Foresman and D. J. Fox, Gaussian 16, Revision B.01; Gaussian, Inc., Wallingford CT, 2016.
4. T. Yanai, D. P. Tew and N. C. Handy, A new hybrid exchange-correlation functional using the Coulomb-attenuating method (CAM-B3LYP), *Chem. Phys. Lett.*, 2004, **393**, 51-57.
5. L. Li, C. Li, Z. Zhang and E. Alexov, On the 'Dielectric "Constant" of Proteins: Smooth Dielectric Function for Macromolecular Modeling and Its Implementation in DelPhi, *J. Chem. Theory Comput.*, 2013, **9**, 2126-2136.
6. V. Sláma, L. Cupellini and B. Mennucci, Exciton properties and optical spectra of light harvesting complex II from a fully atomistic description, *Phys. Chem. Chem. Phys.*, 2020, **22**, 16783-16795.
7. C. Curutchet, A. Muñoz-Losa, S. Monti, J. Kongsted, G. D. Scholes and B. Mennucci, Electronic Energy Transfer in Condensed Phase Studied by a Polarizable QM/MM Model, *J. Chem. Theory Comput.*, 2009, **5**, 1838-1848.
8. A. Sirohiwal, R. Berraud-Pache, F. Neese, R. Izsák and D. A. Pantazis, Accurate Computation of the Absorption Spectrum of Chlorophyll *a* with Pair Natural Orbital Coupled Cluster Methods, *J. Phys. Chem. B*, 2020, **124**, 8761-8771.
9. Z. F. Liu, H. C. Yan, K. B. Wang, T. Y. Kuang, J. P. Zhang, L. L. Gui, X. M. An and W. R. Chang, Crystal structure of spinach major light-harvesting complex at 2.72 Å resolution, *Nature*, 2004, **428**, 287-292.
